# Supplementary figures and images for: Carbon-isotope chemostratigraphy, geochemistry, and biostratigraphy of the Paleocene-Eocene Thermal Maximum, deep-water Wilcox Group, Gulf of Mexico (U.S.A.)
Source: Copernicus journal article supplement (doi:10.5194/cp-2022-86), 2022-12-09

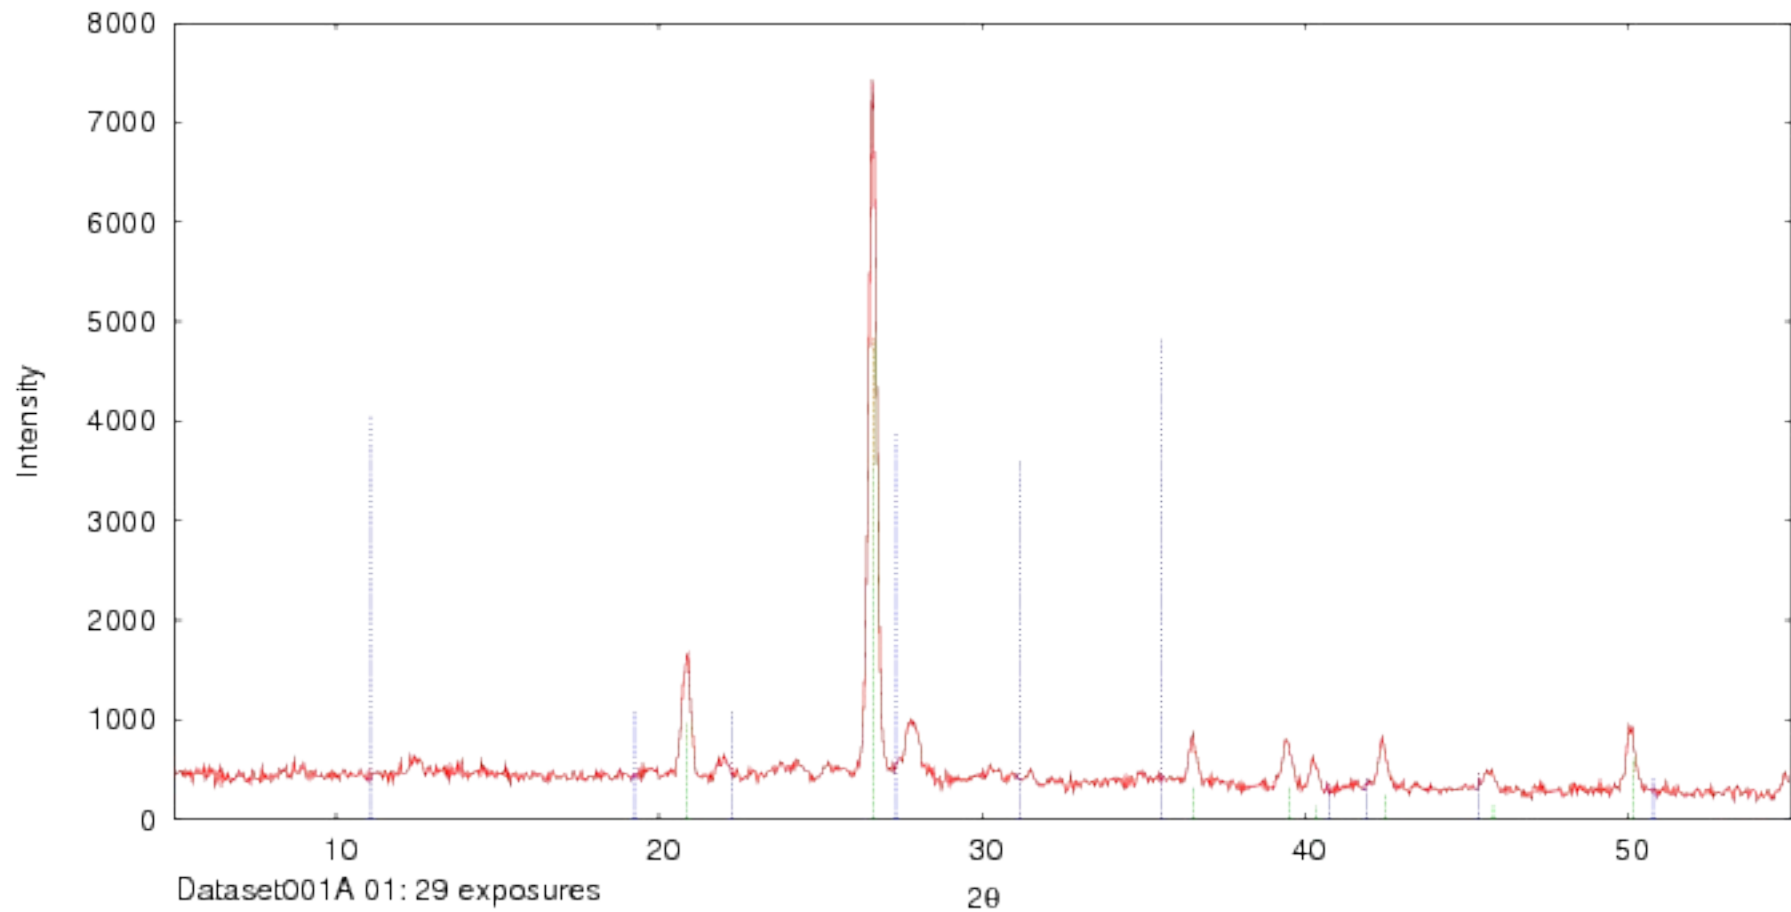

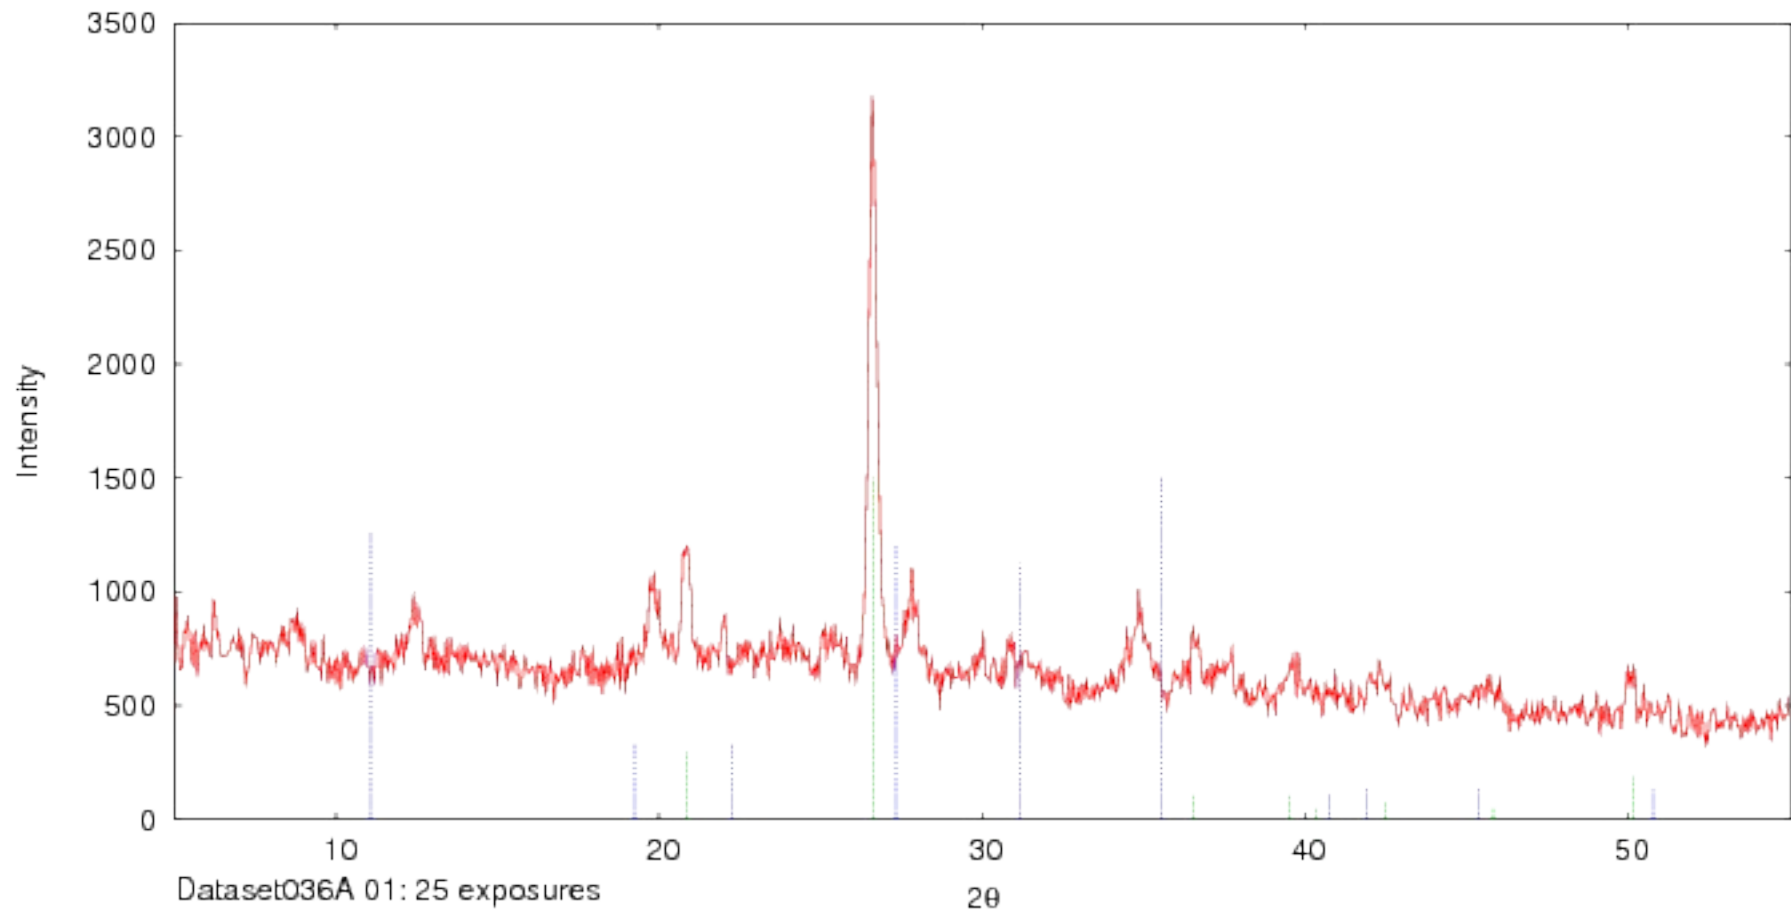

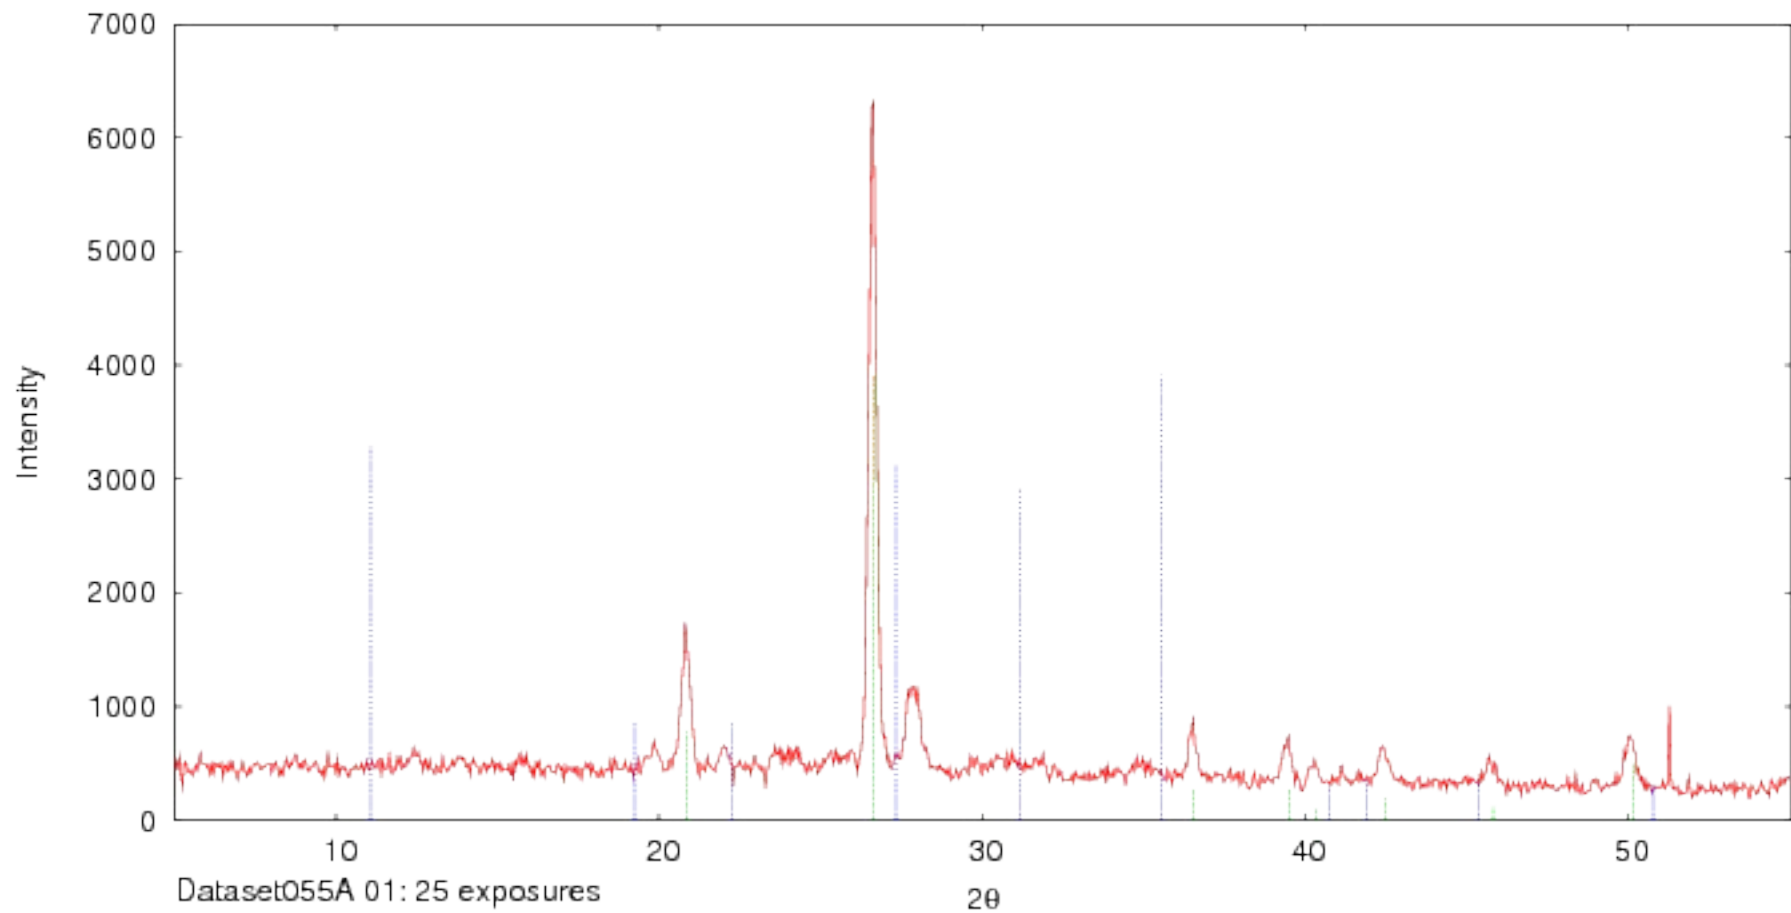

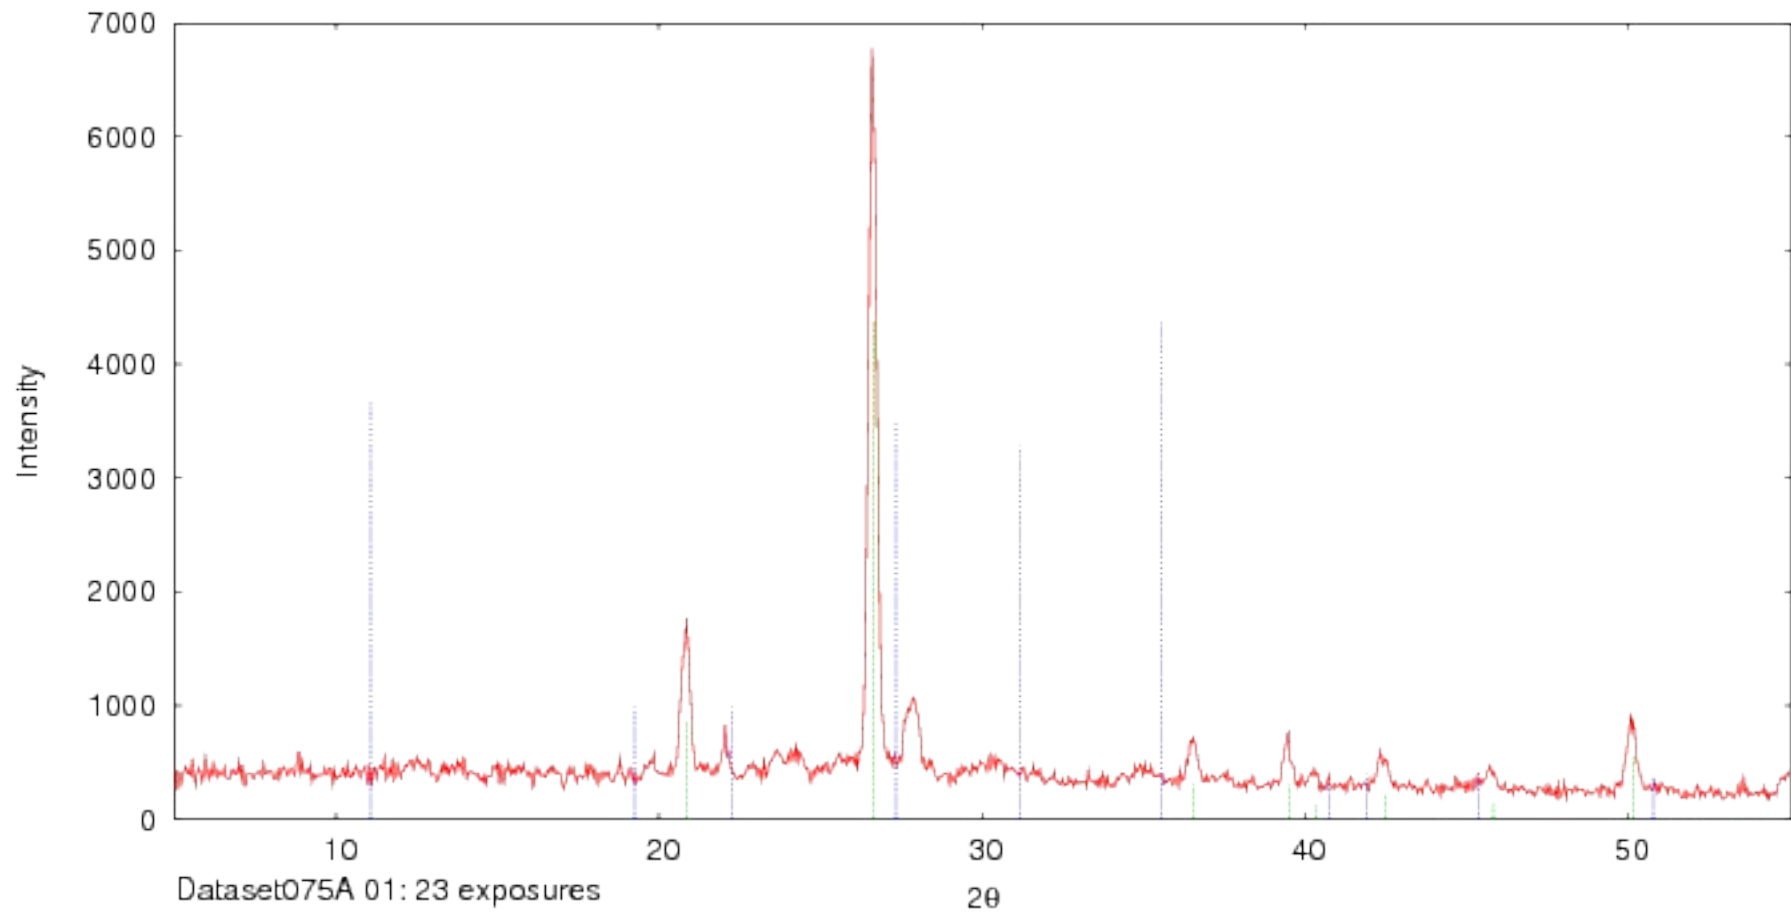

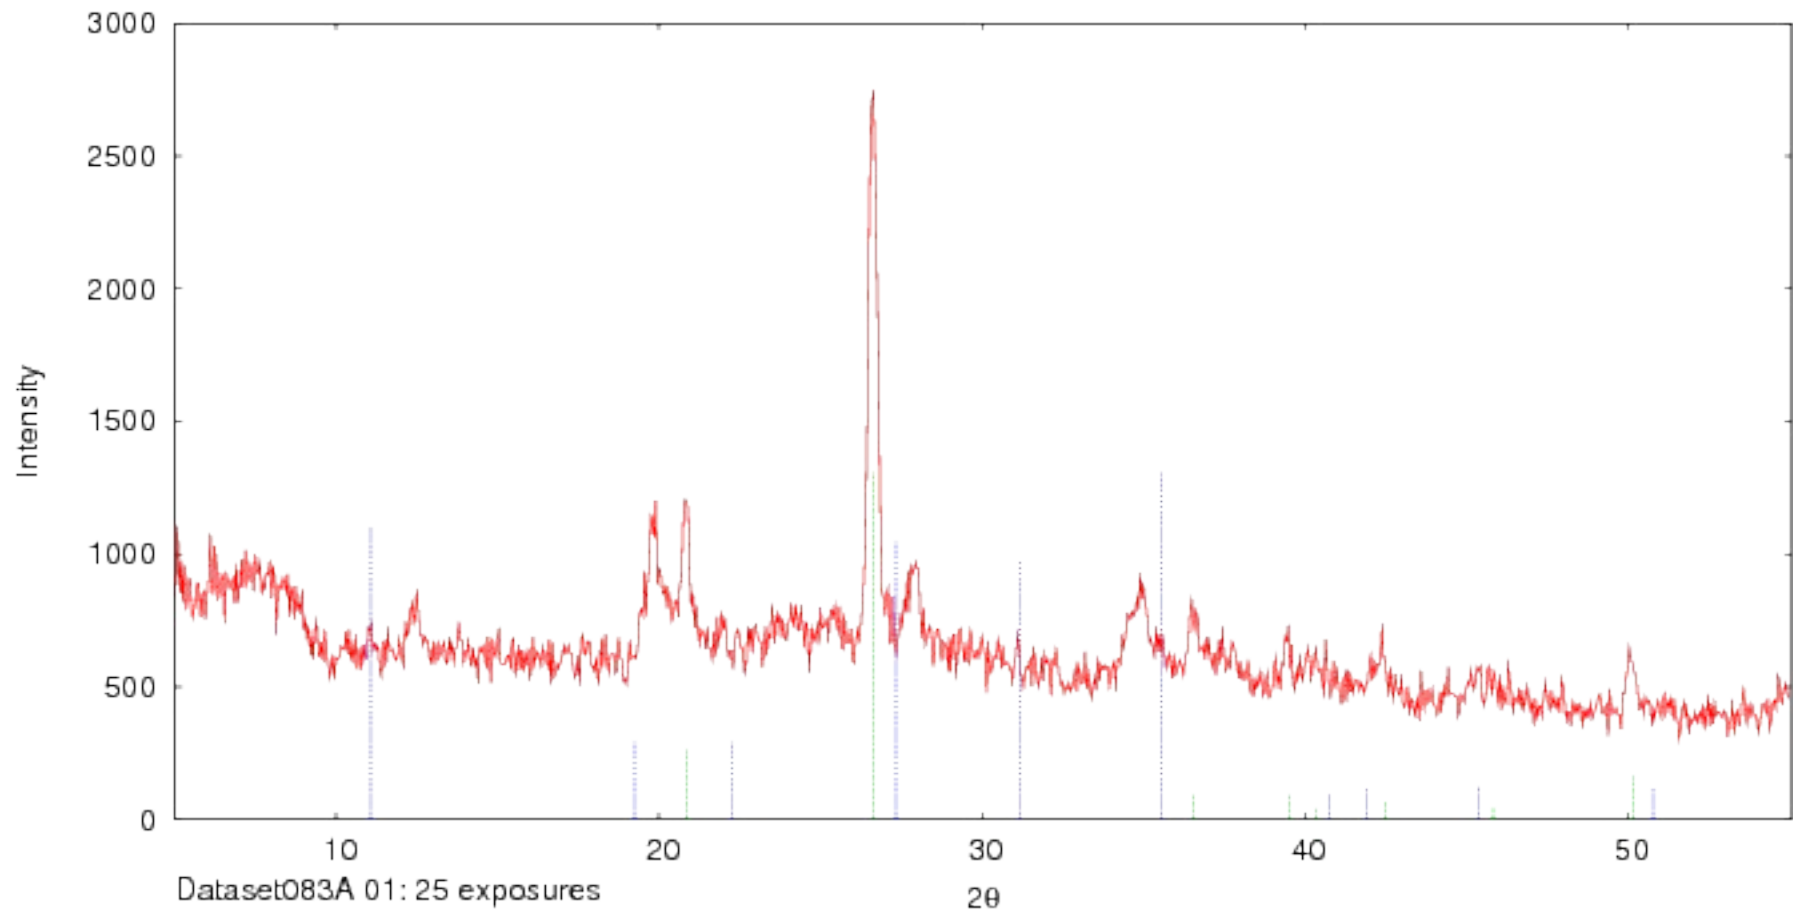

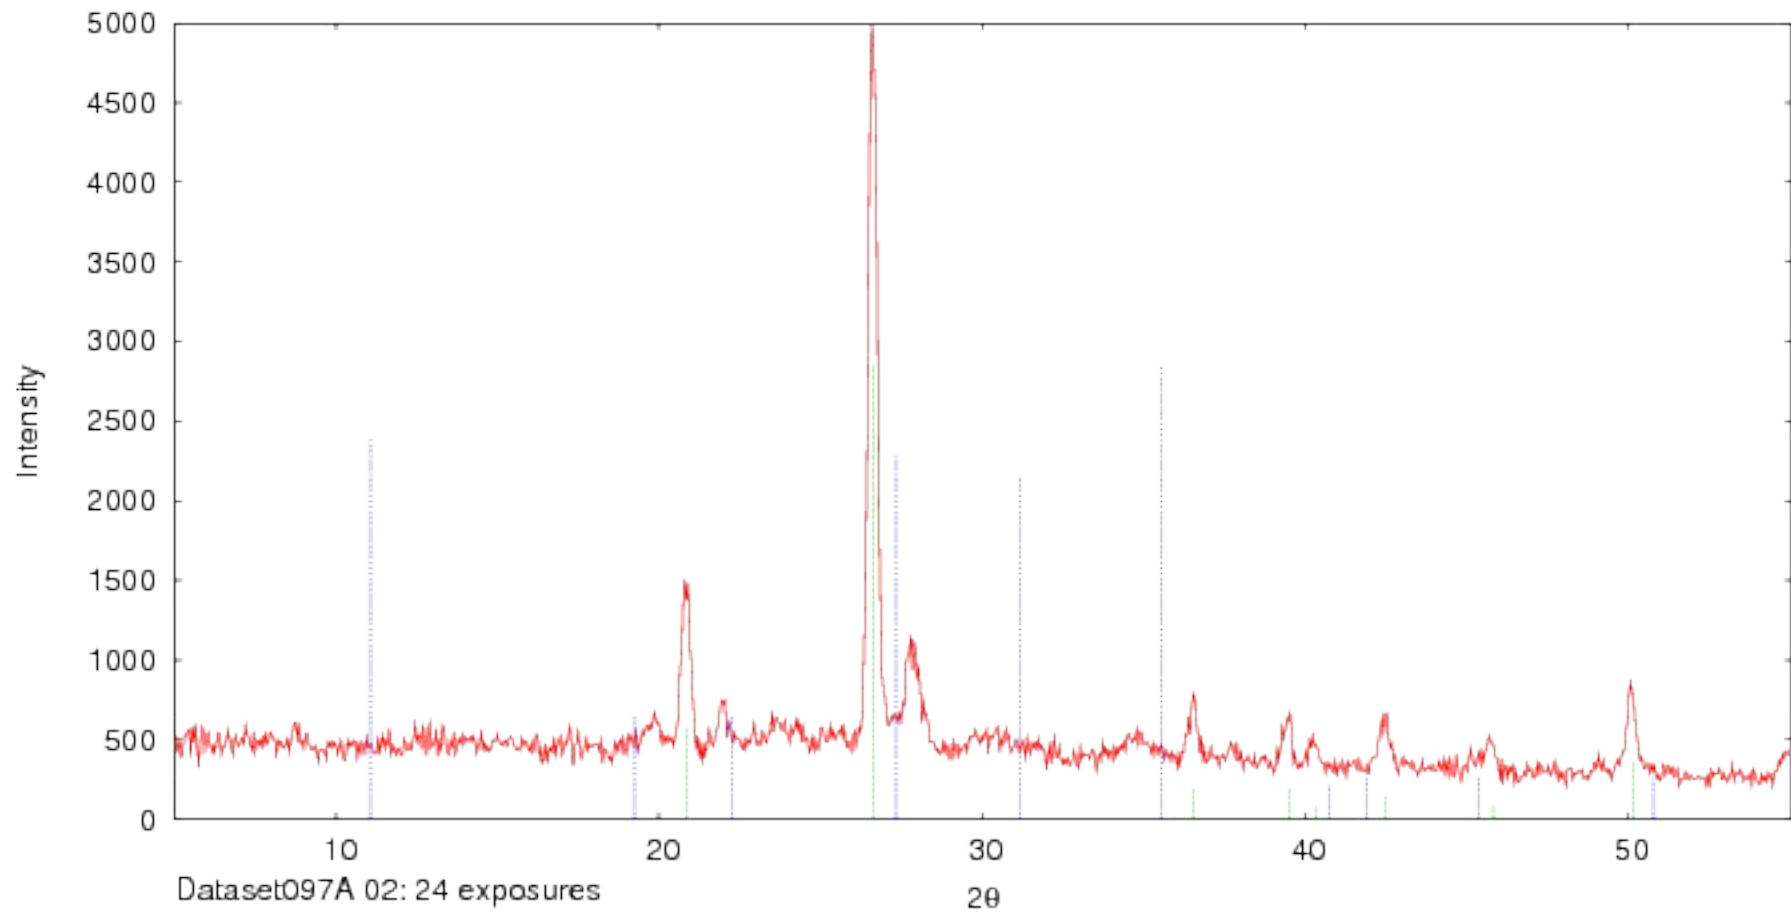

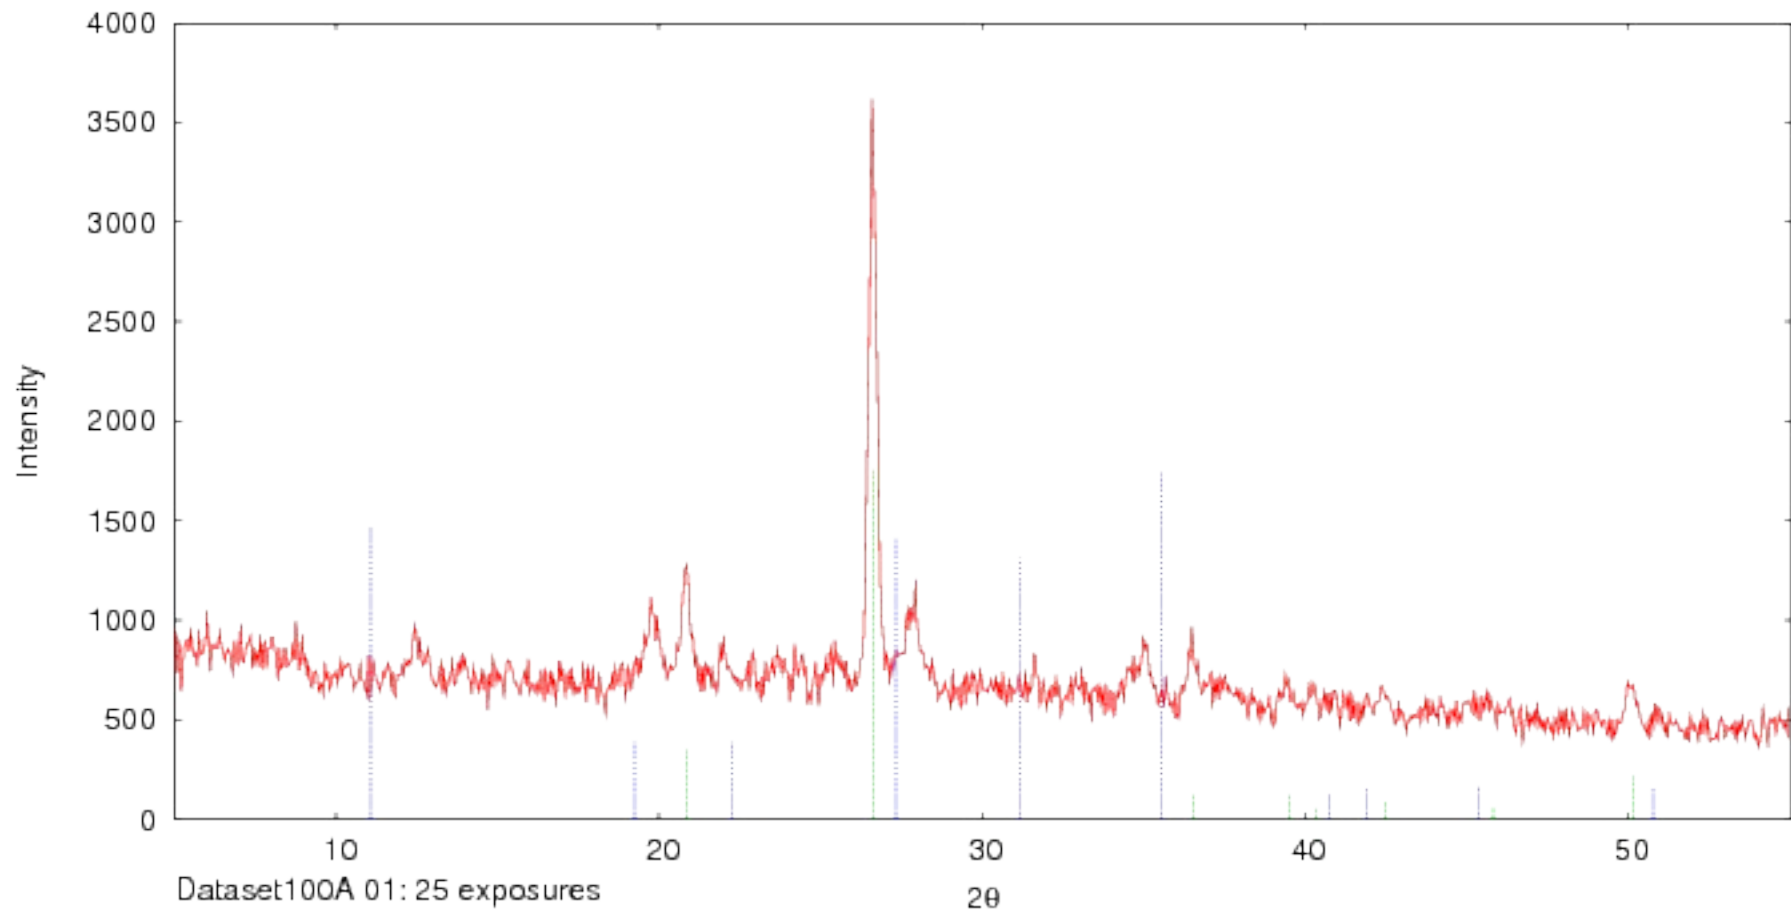

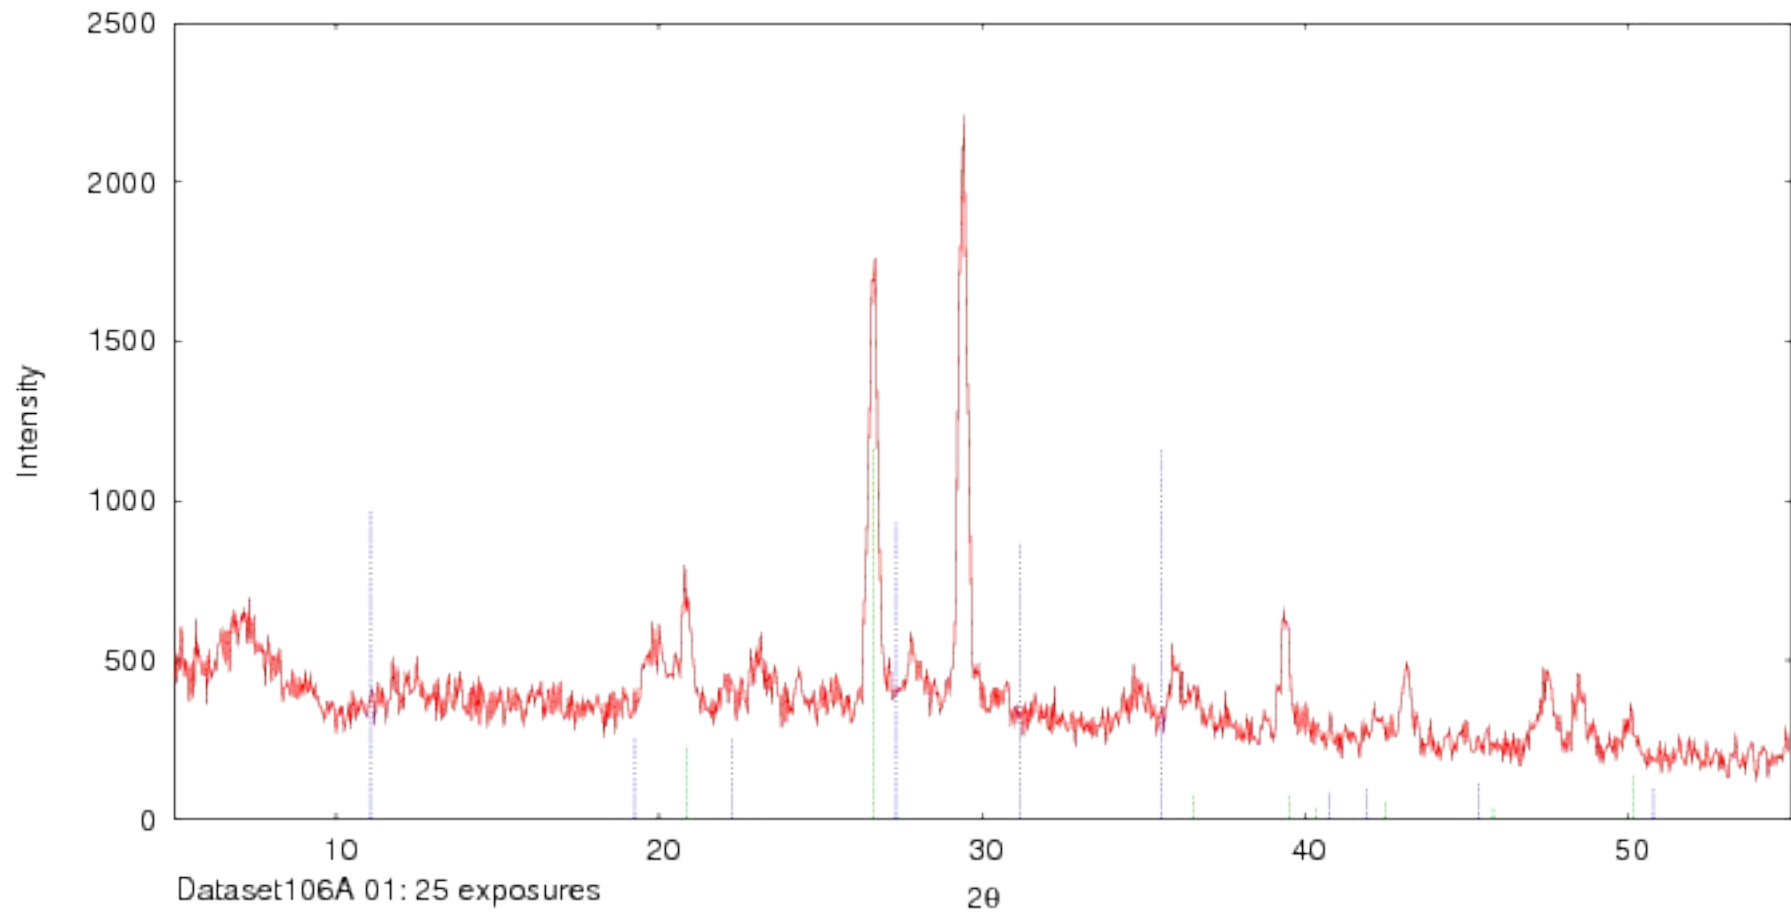



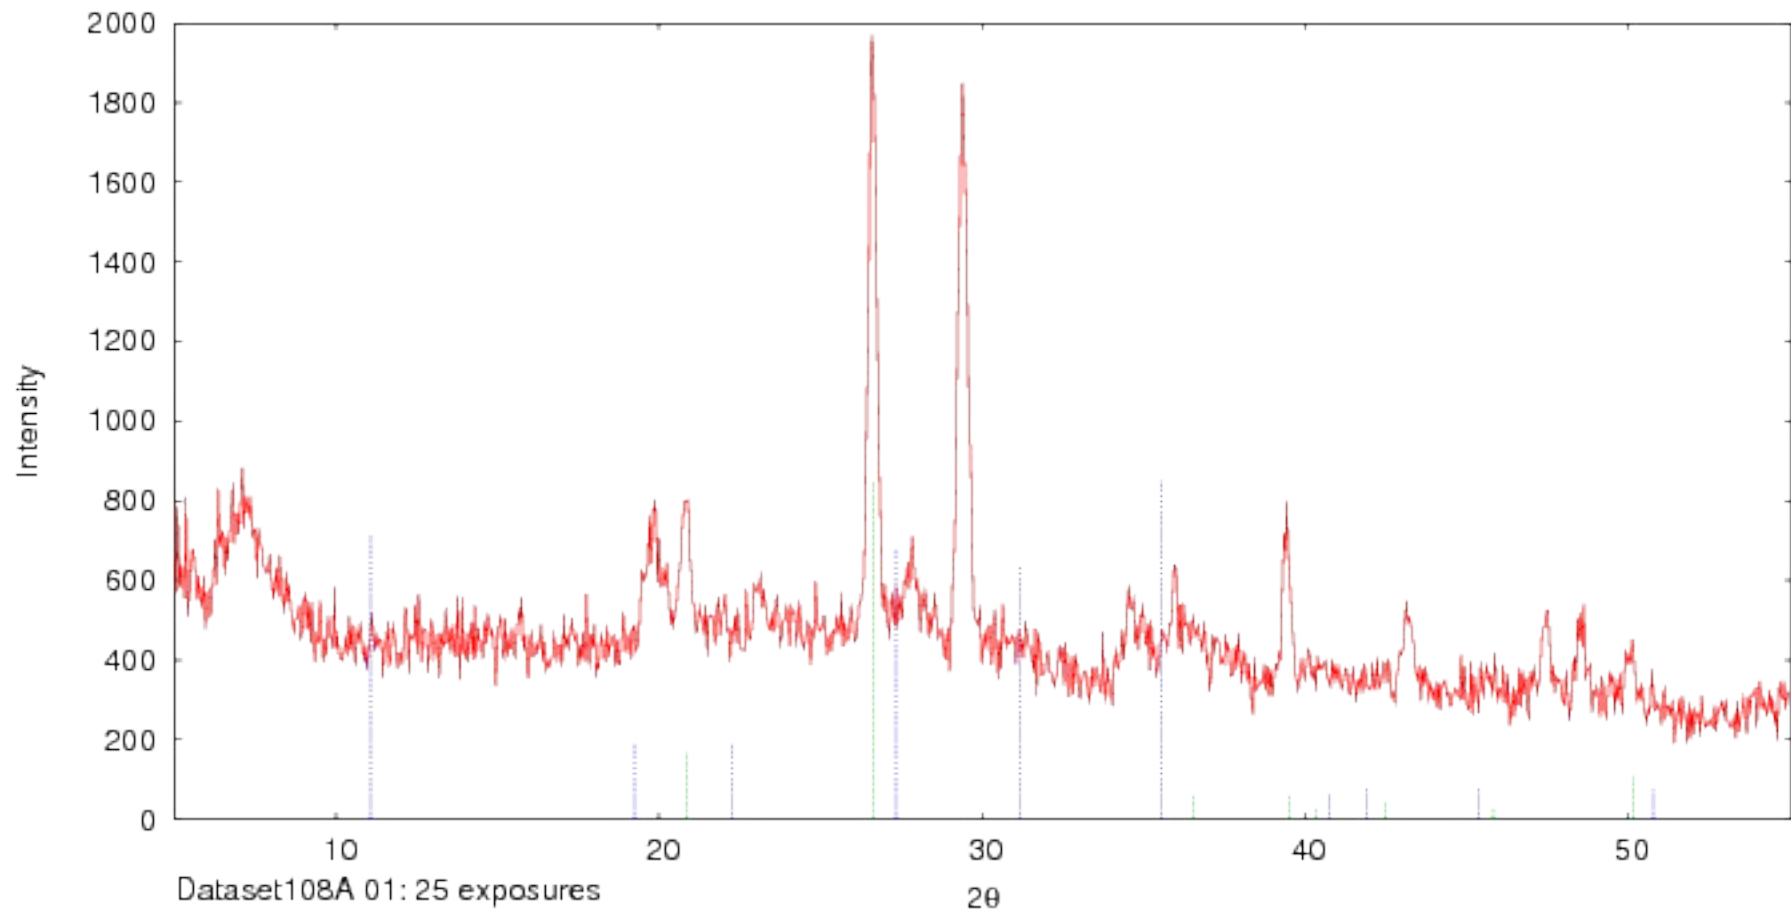

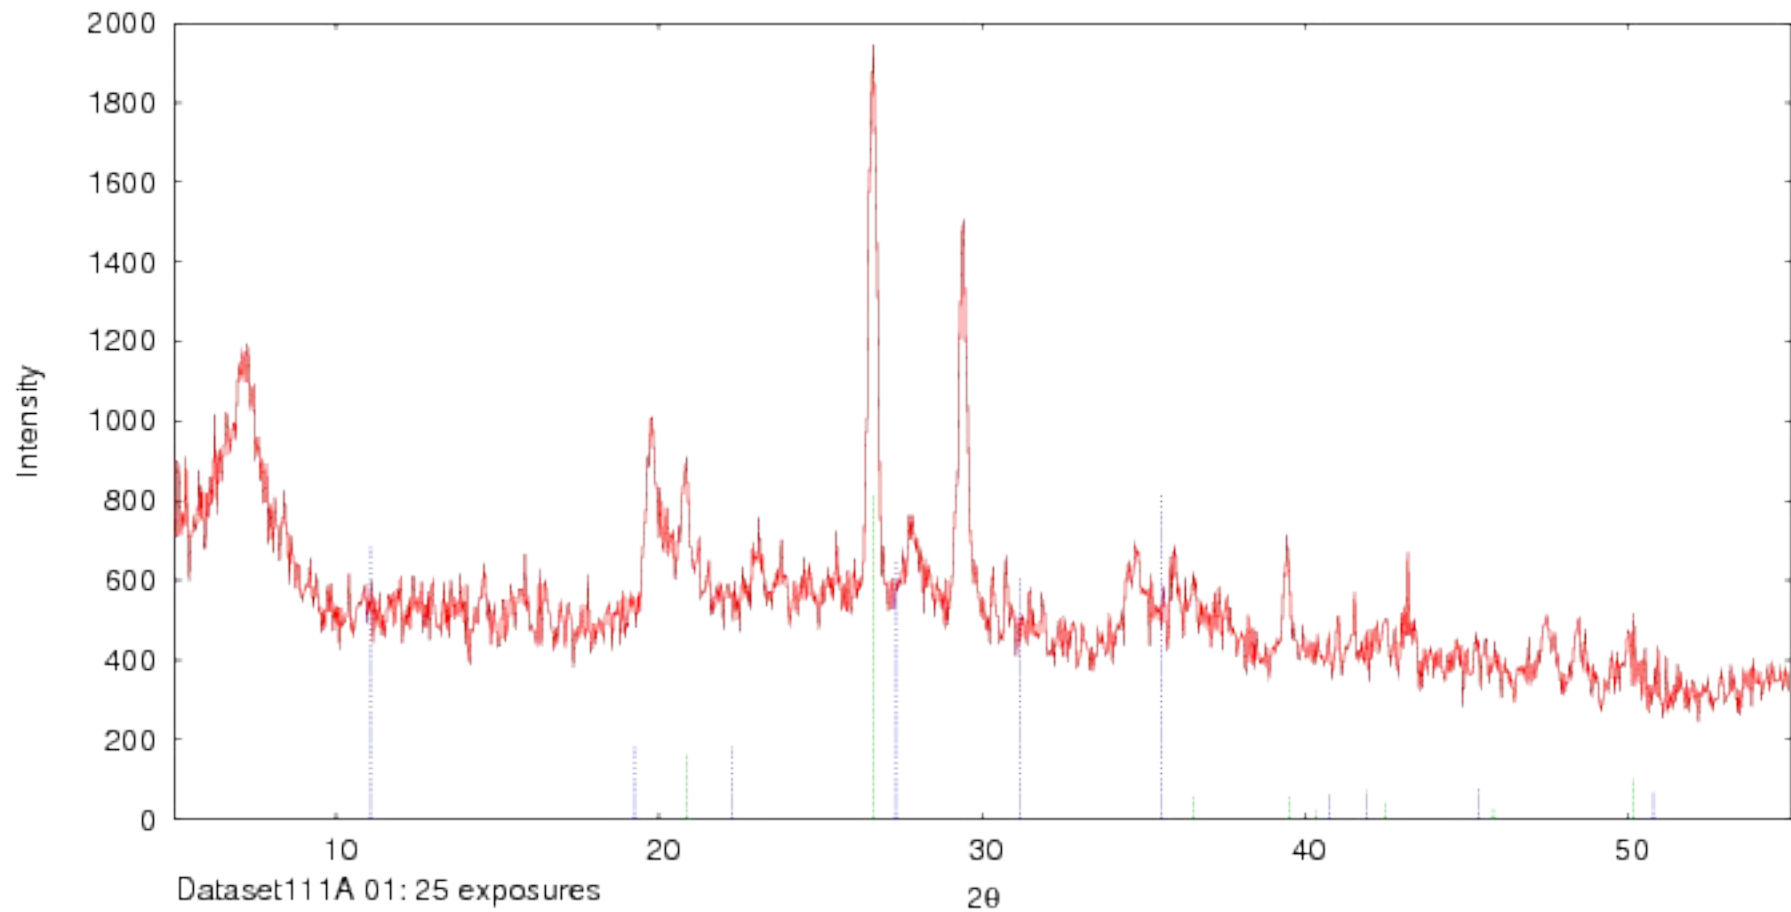

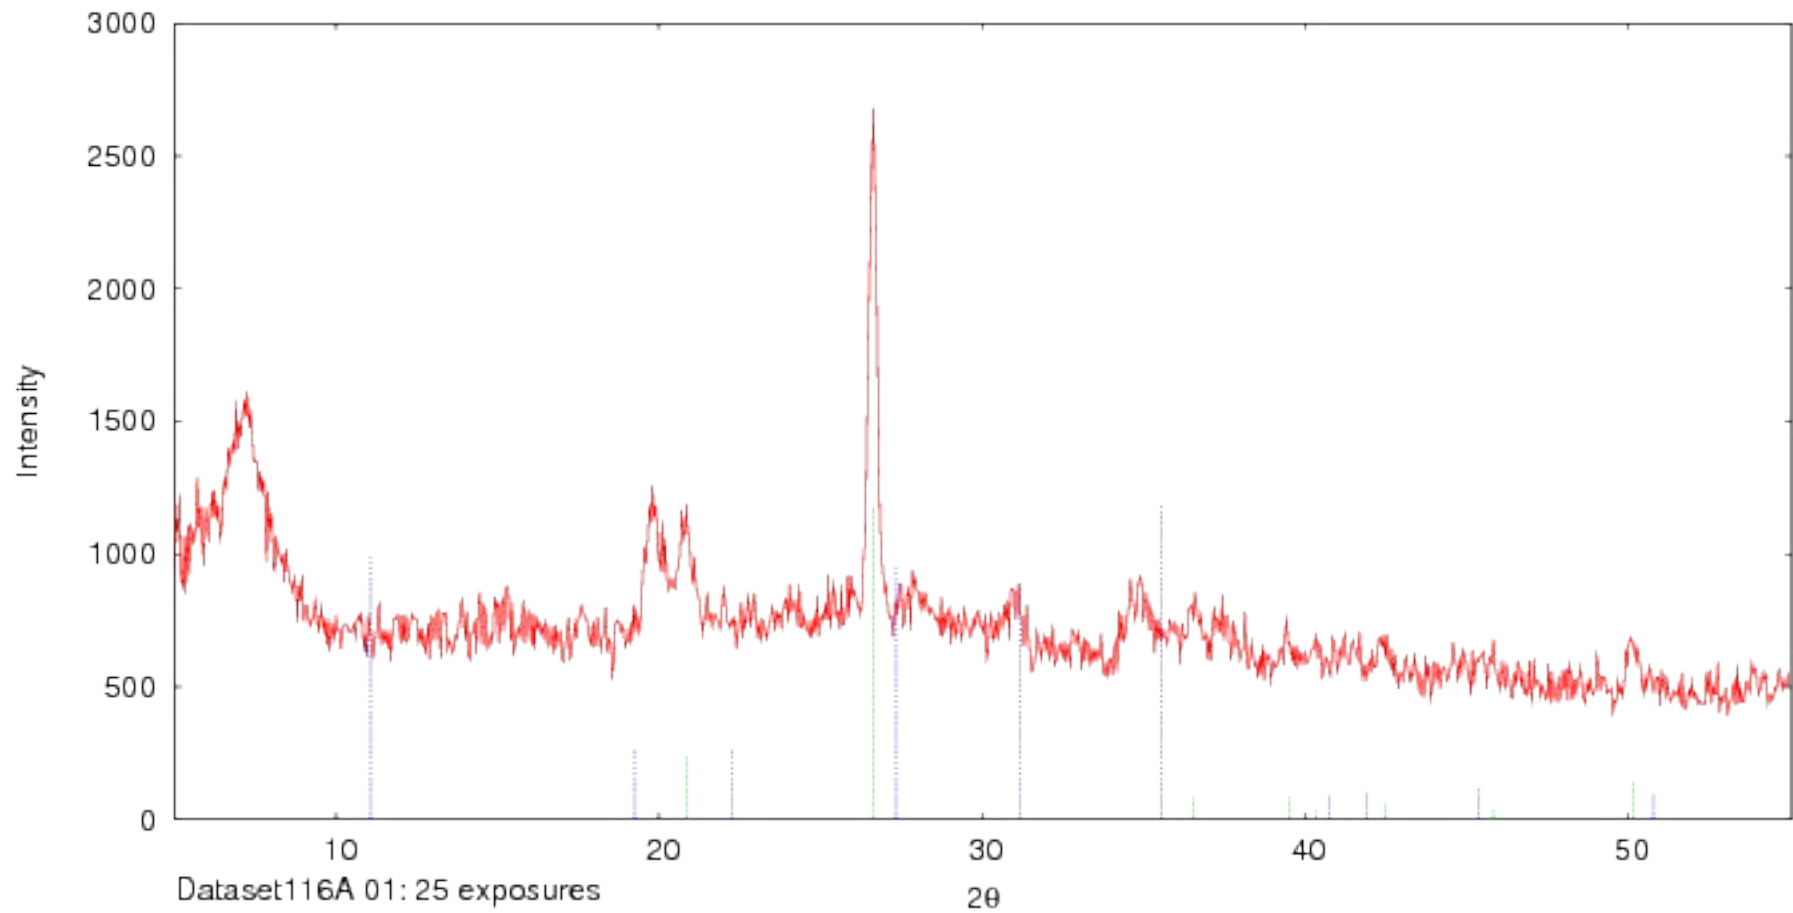

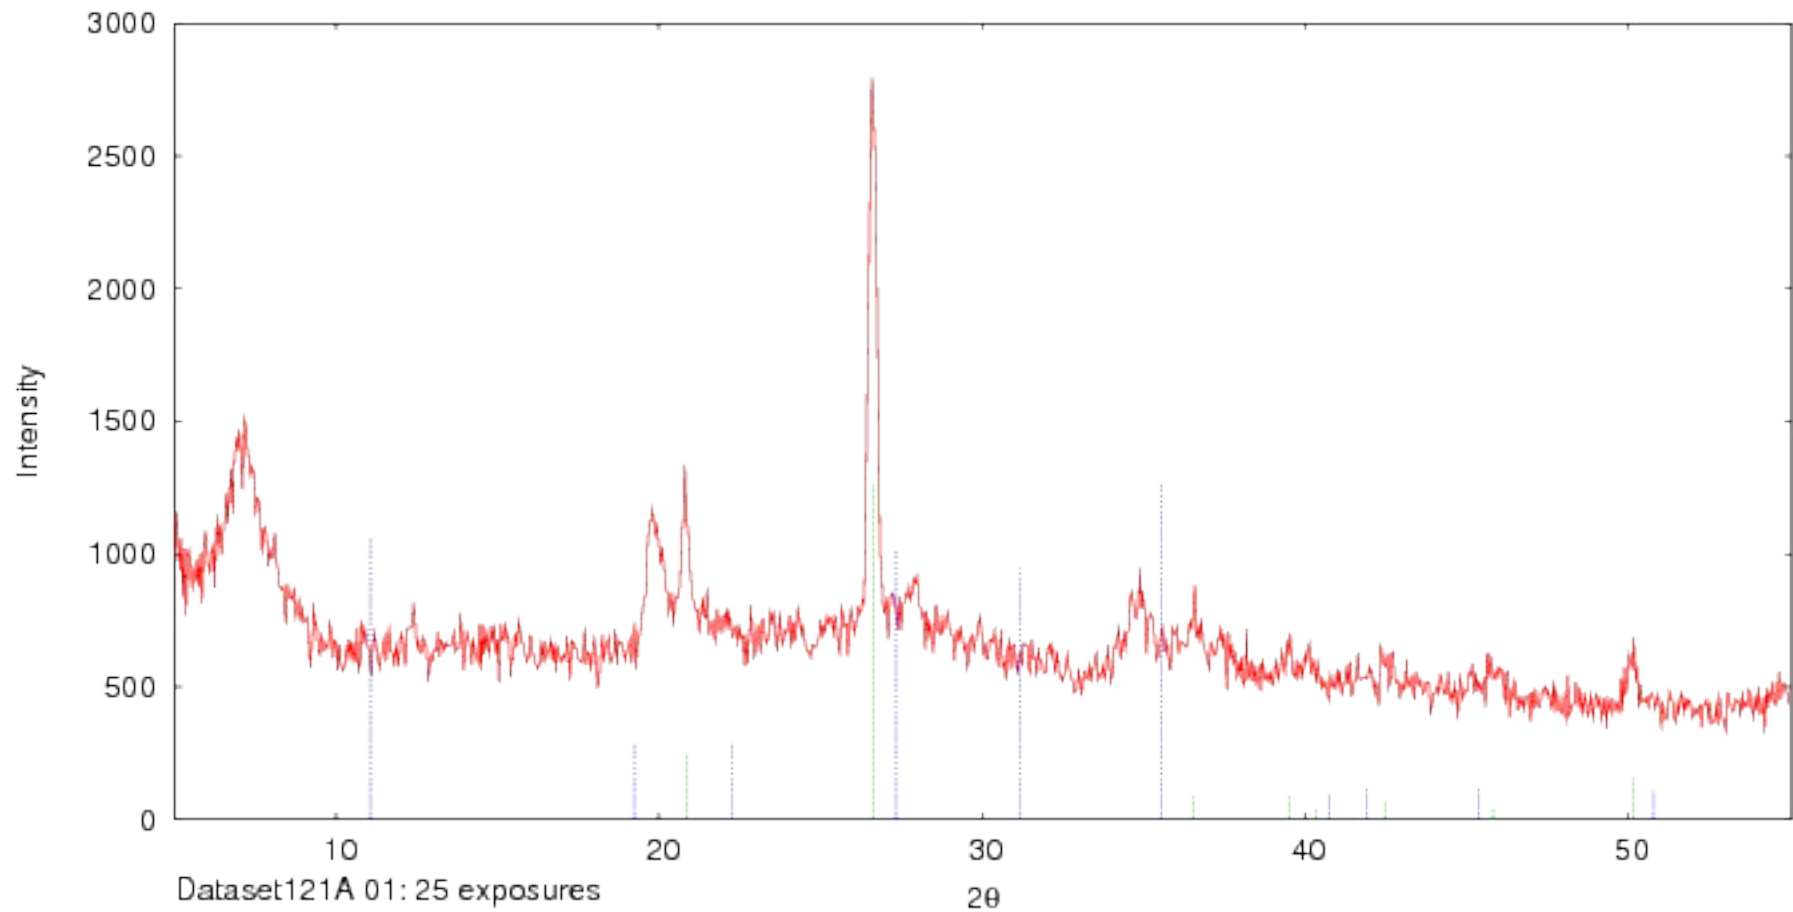

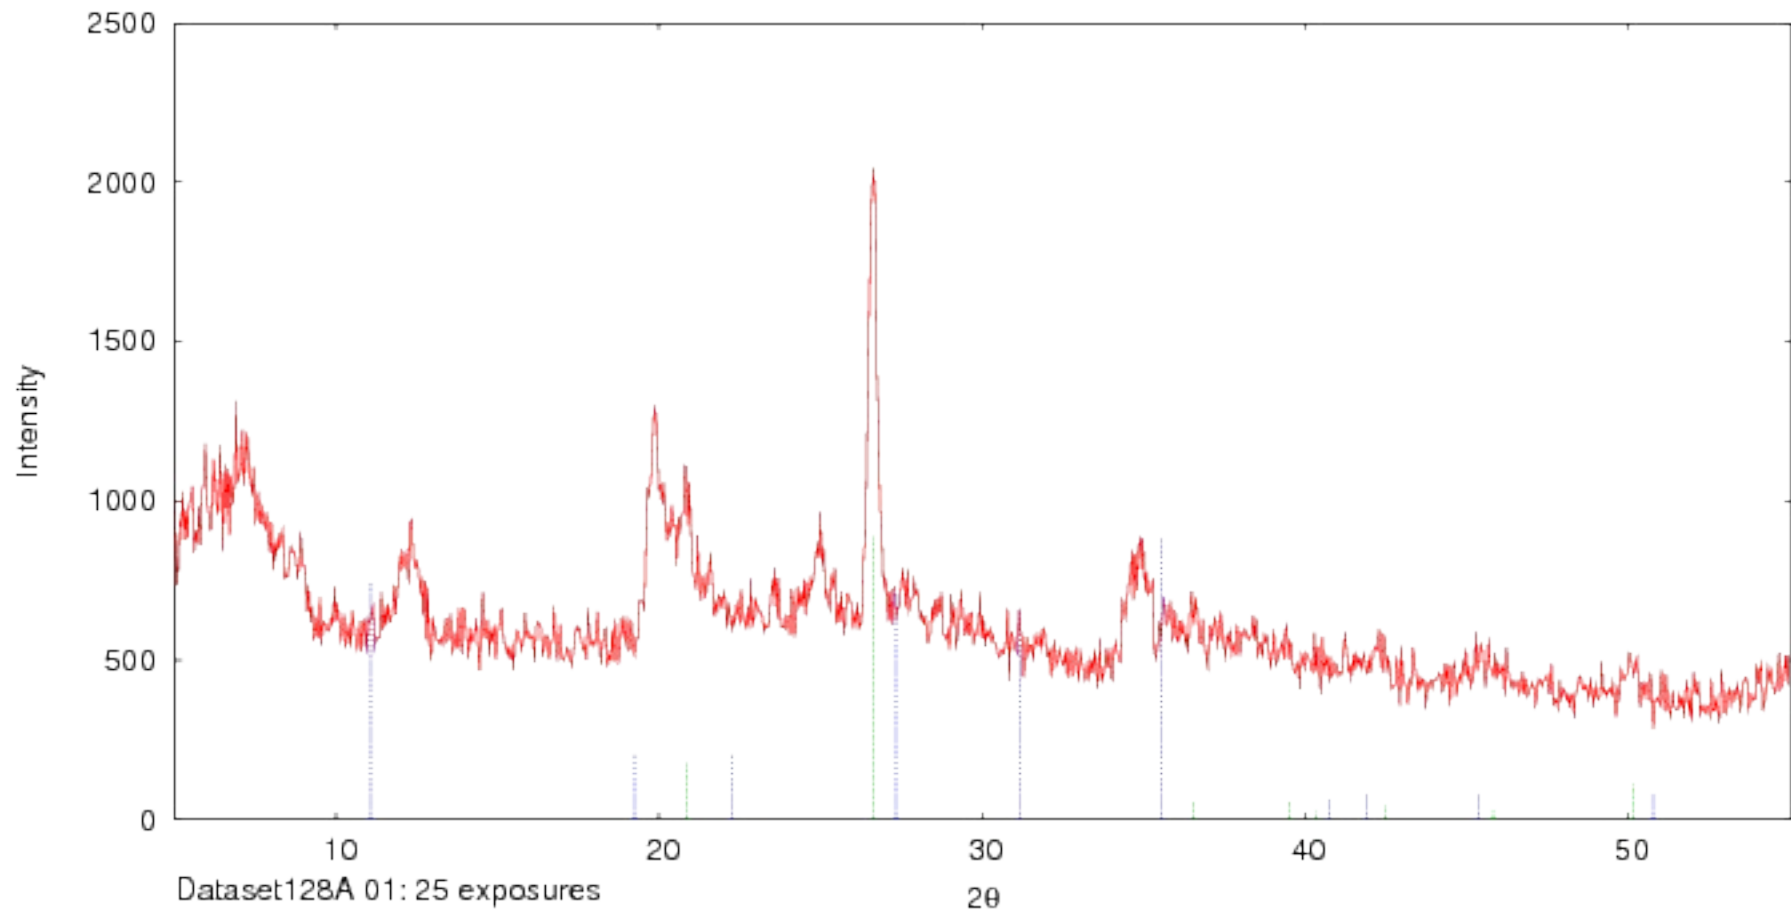

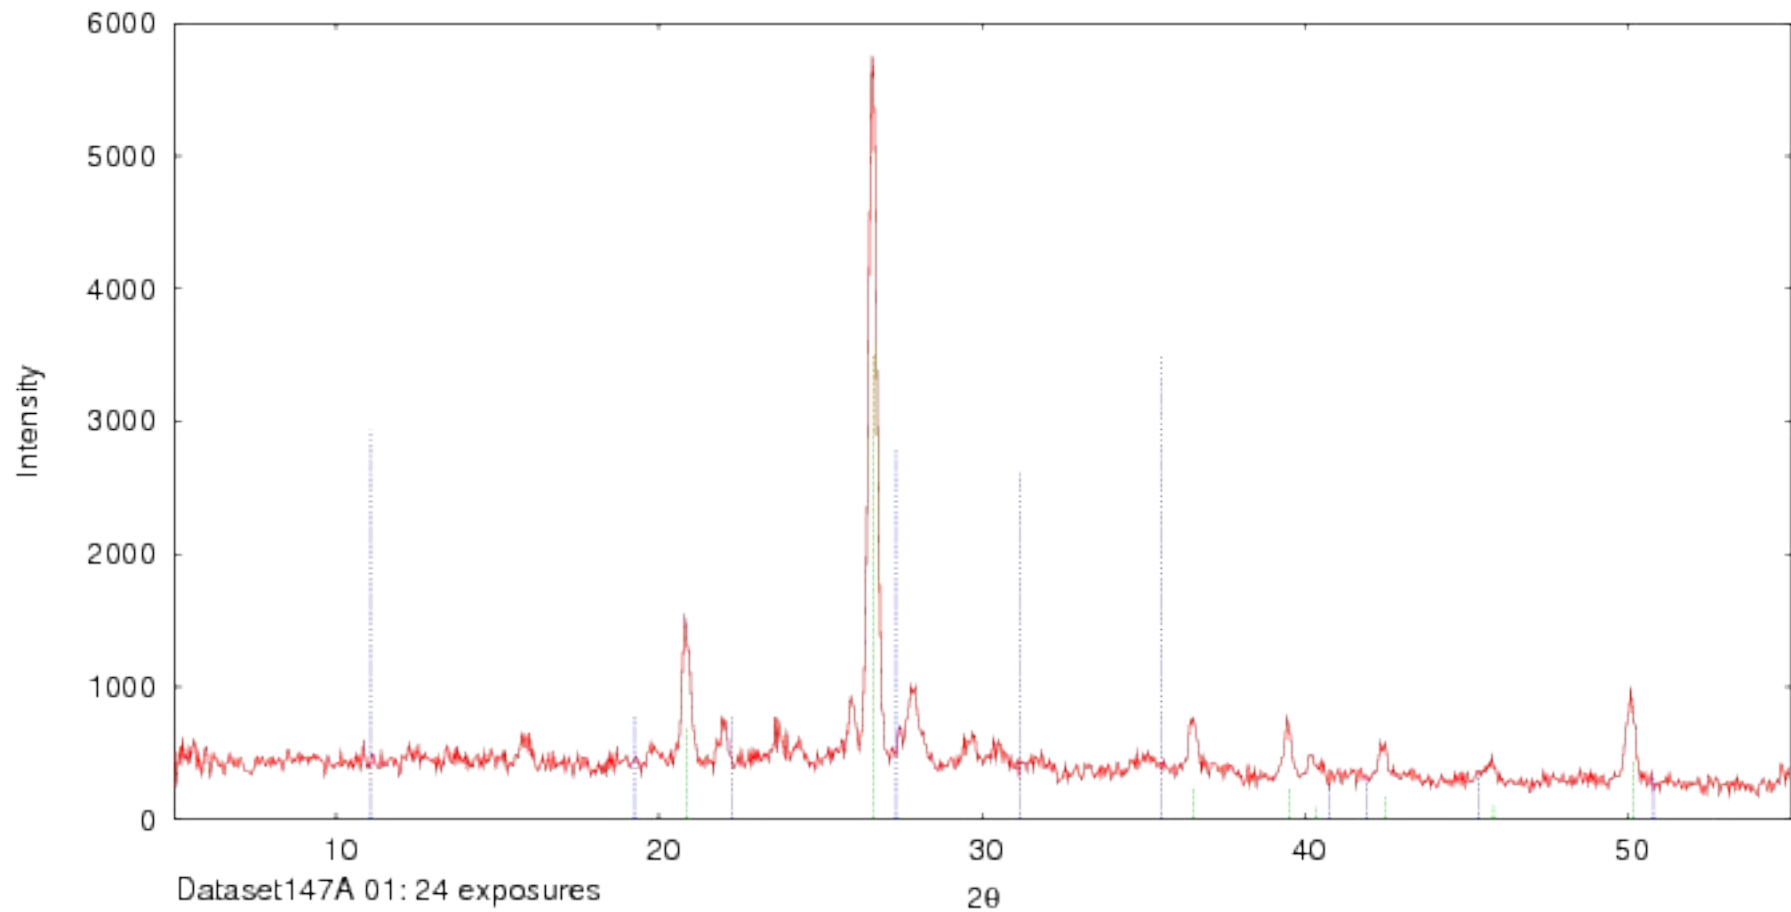

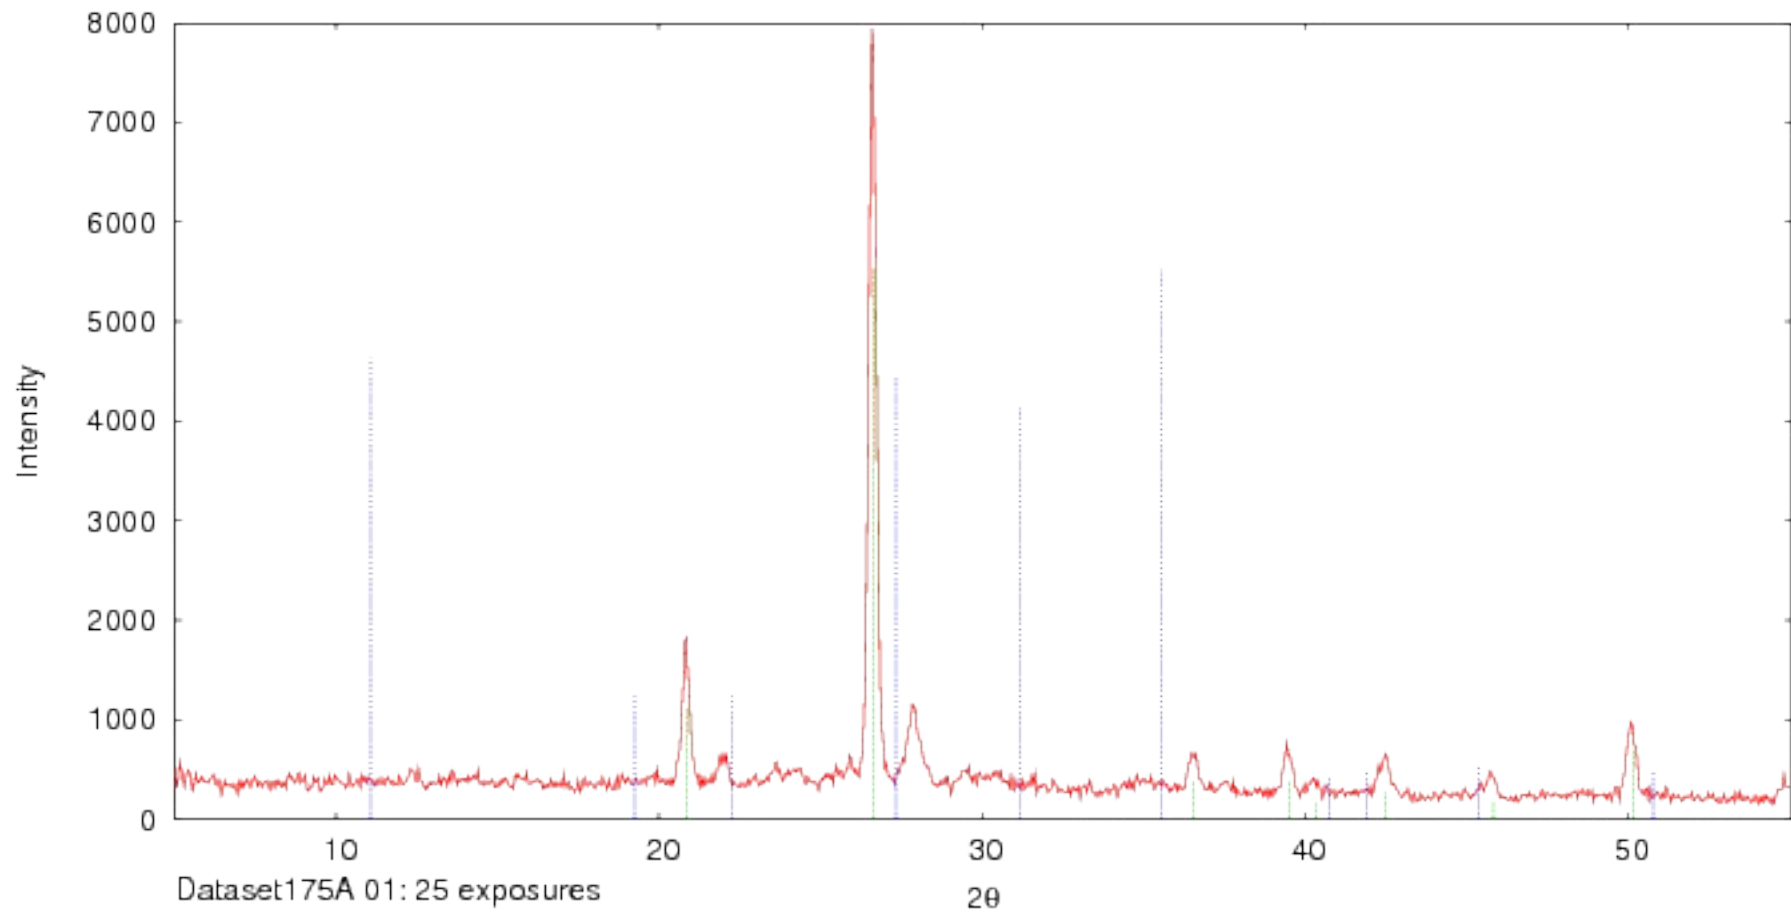

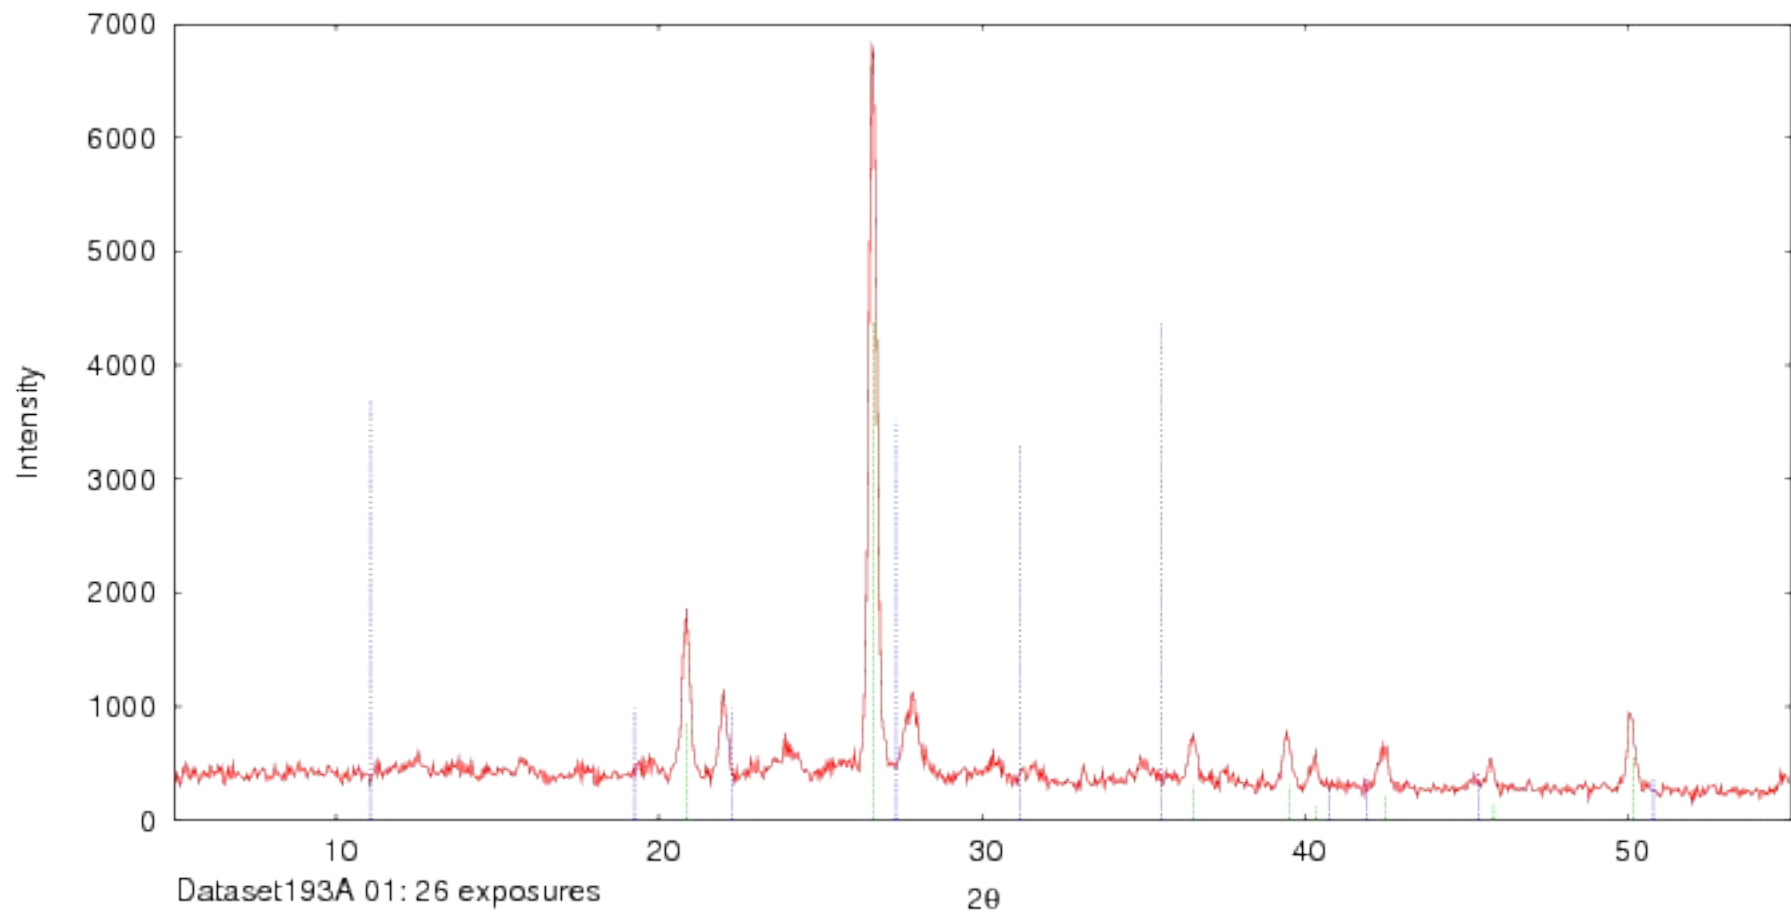



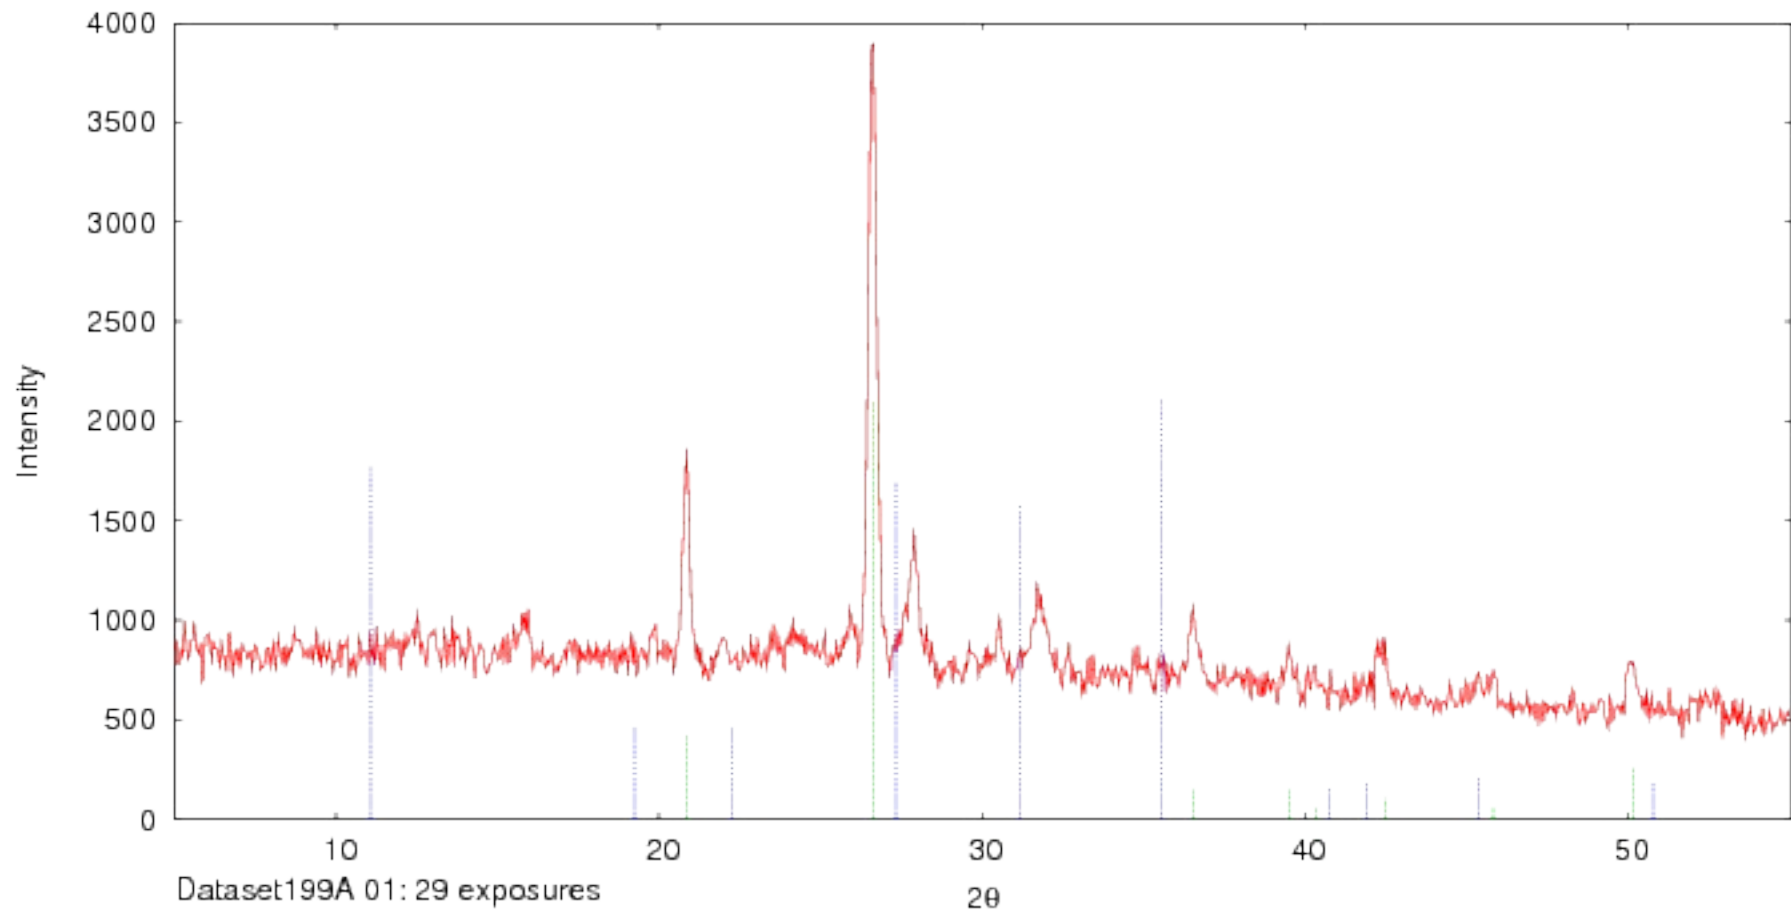

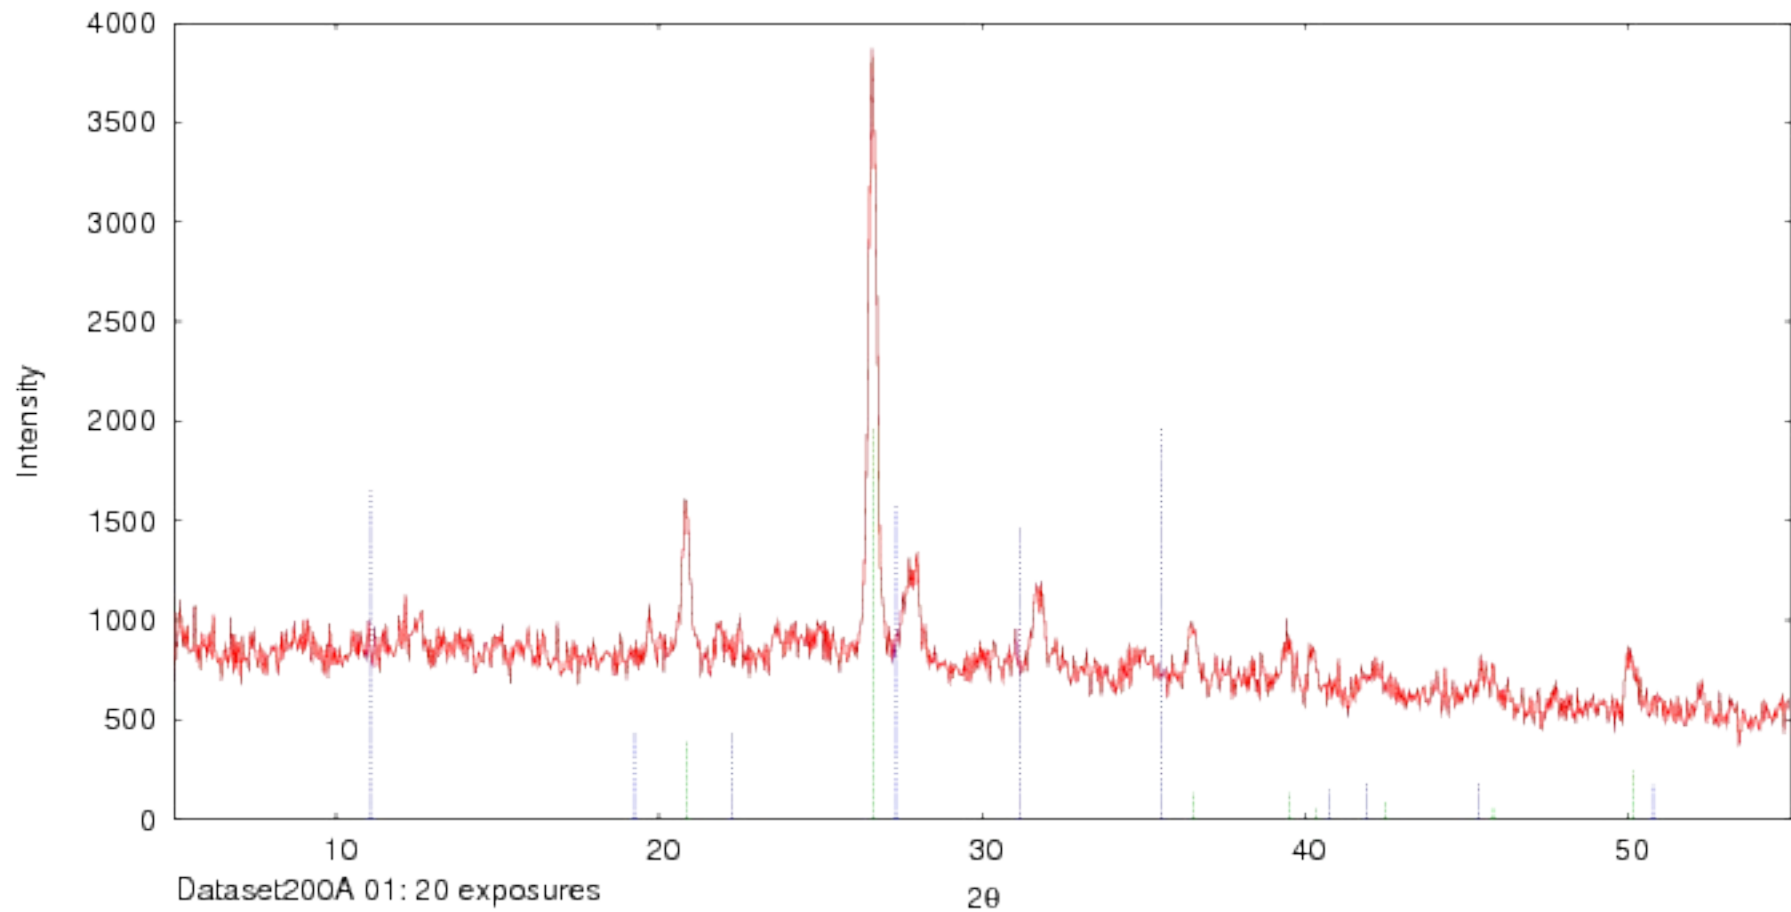

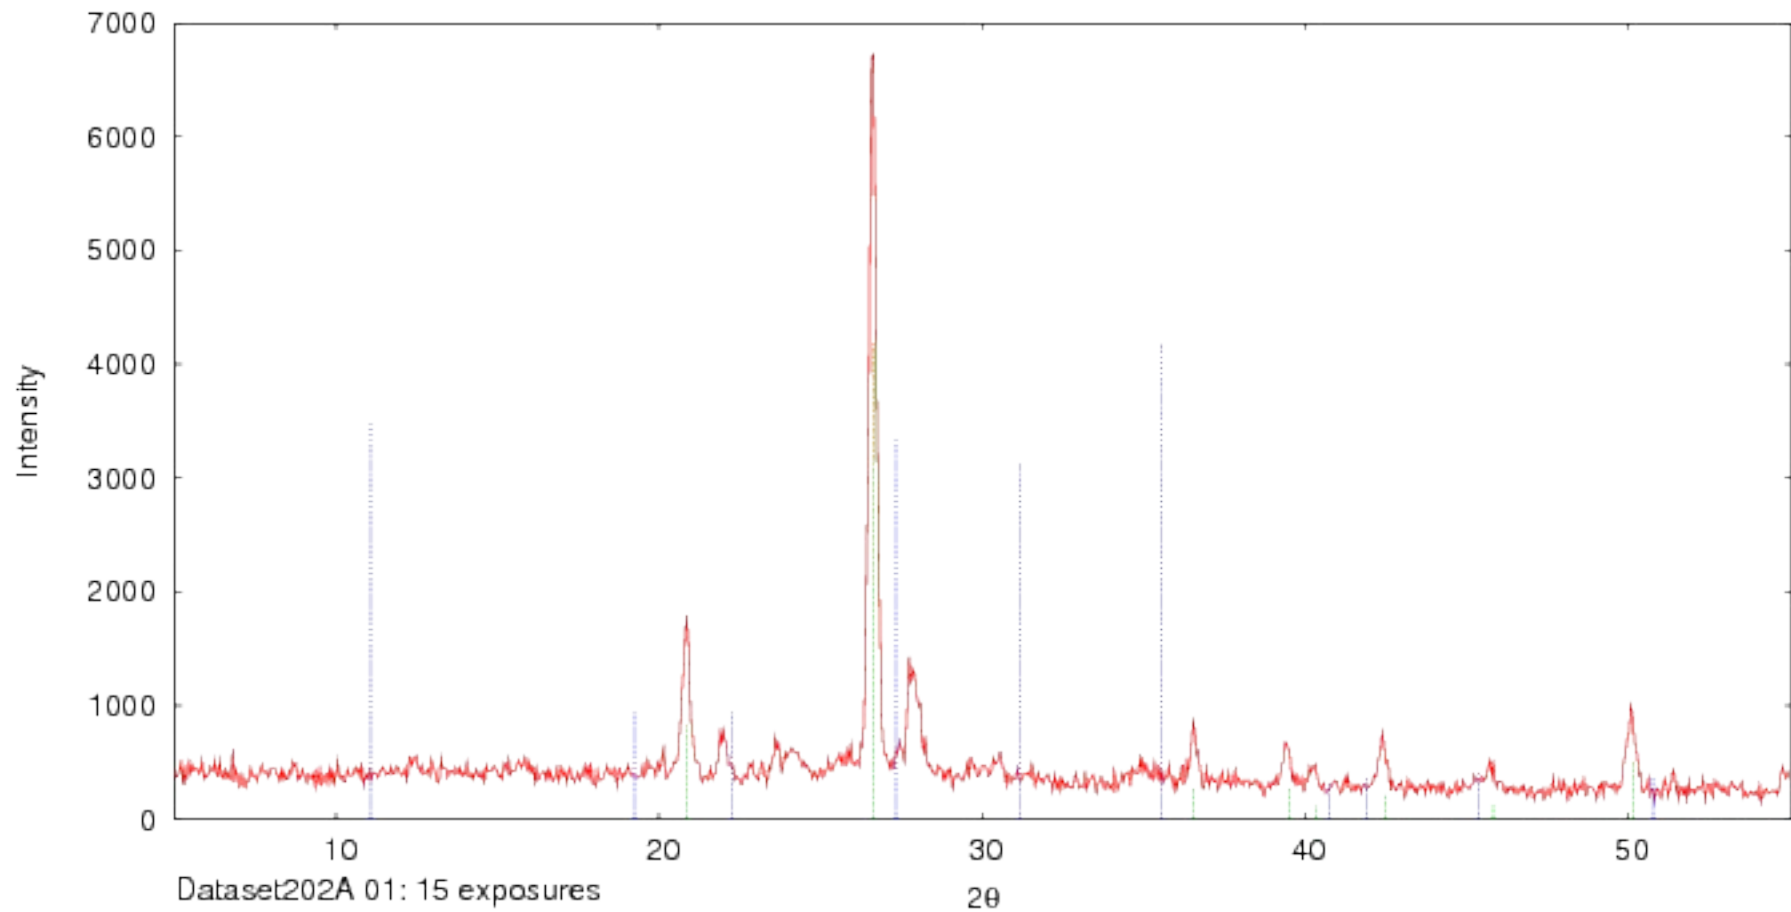

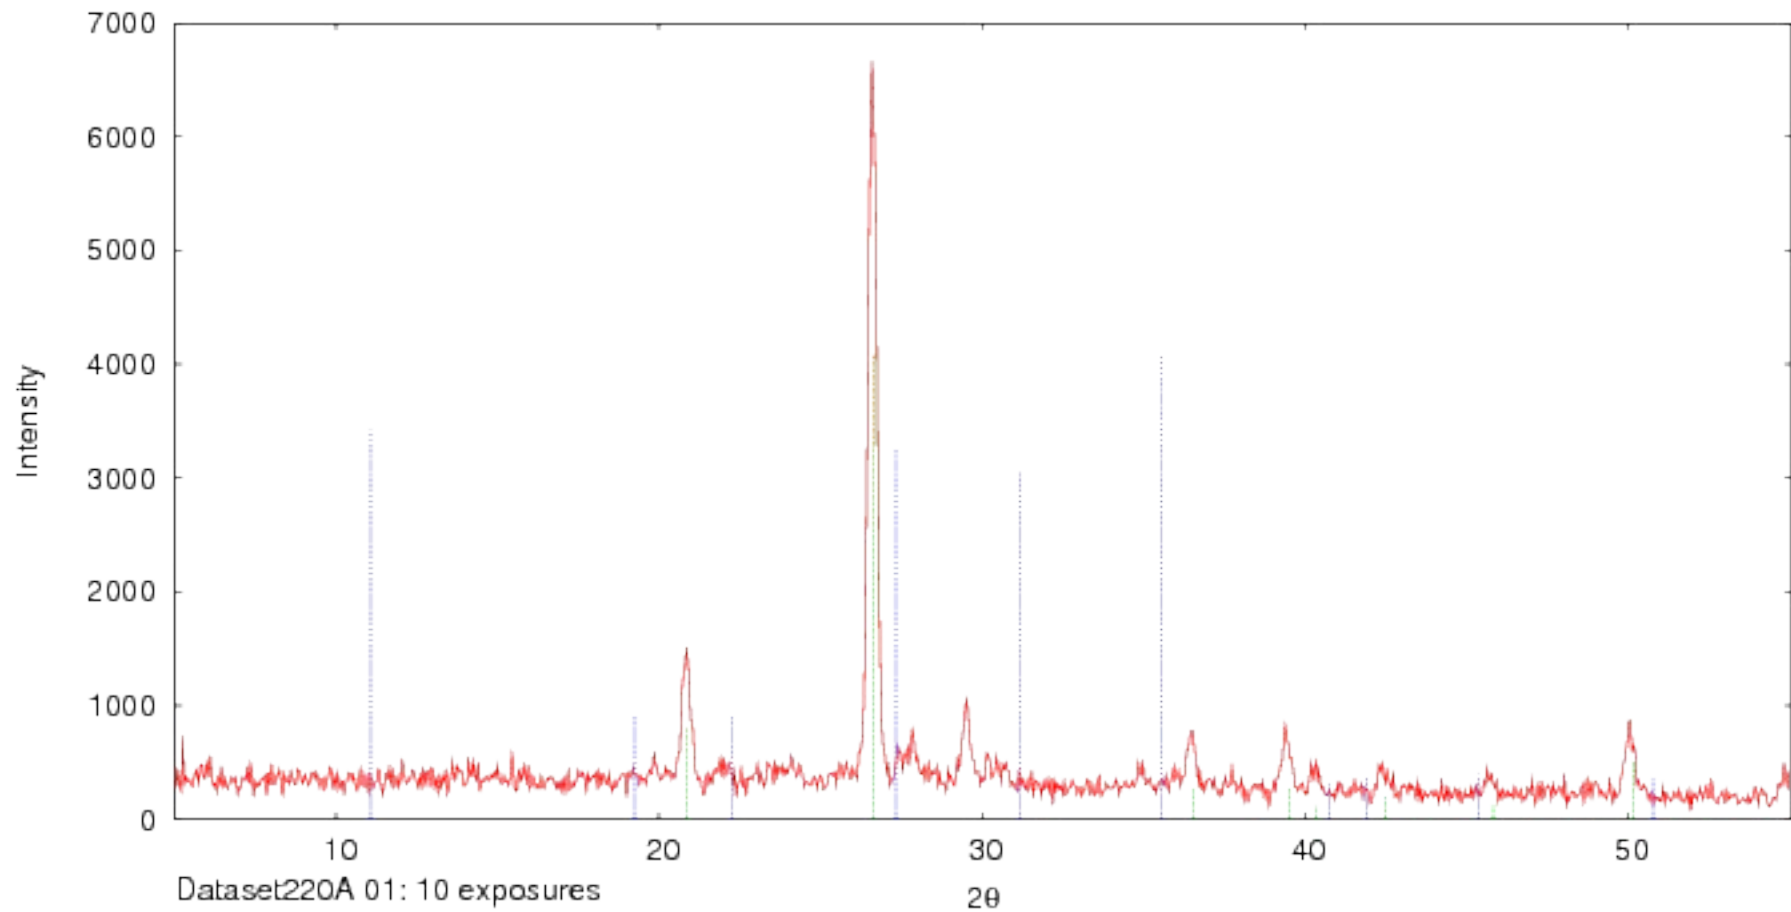

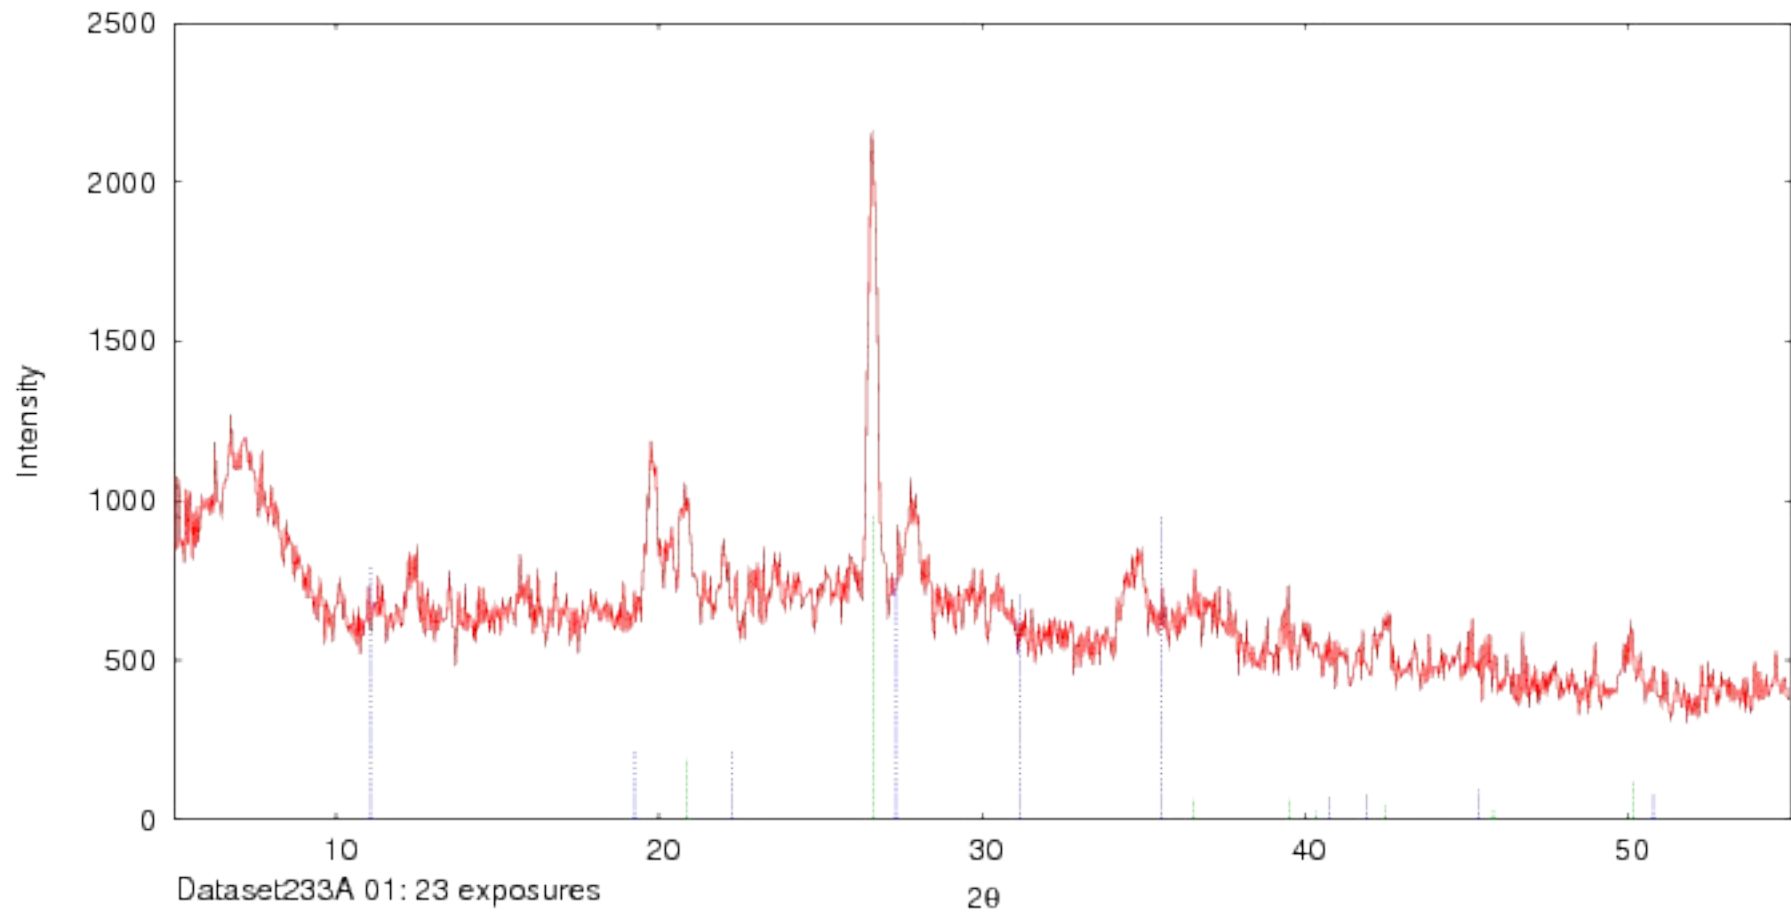

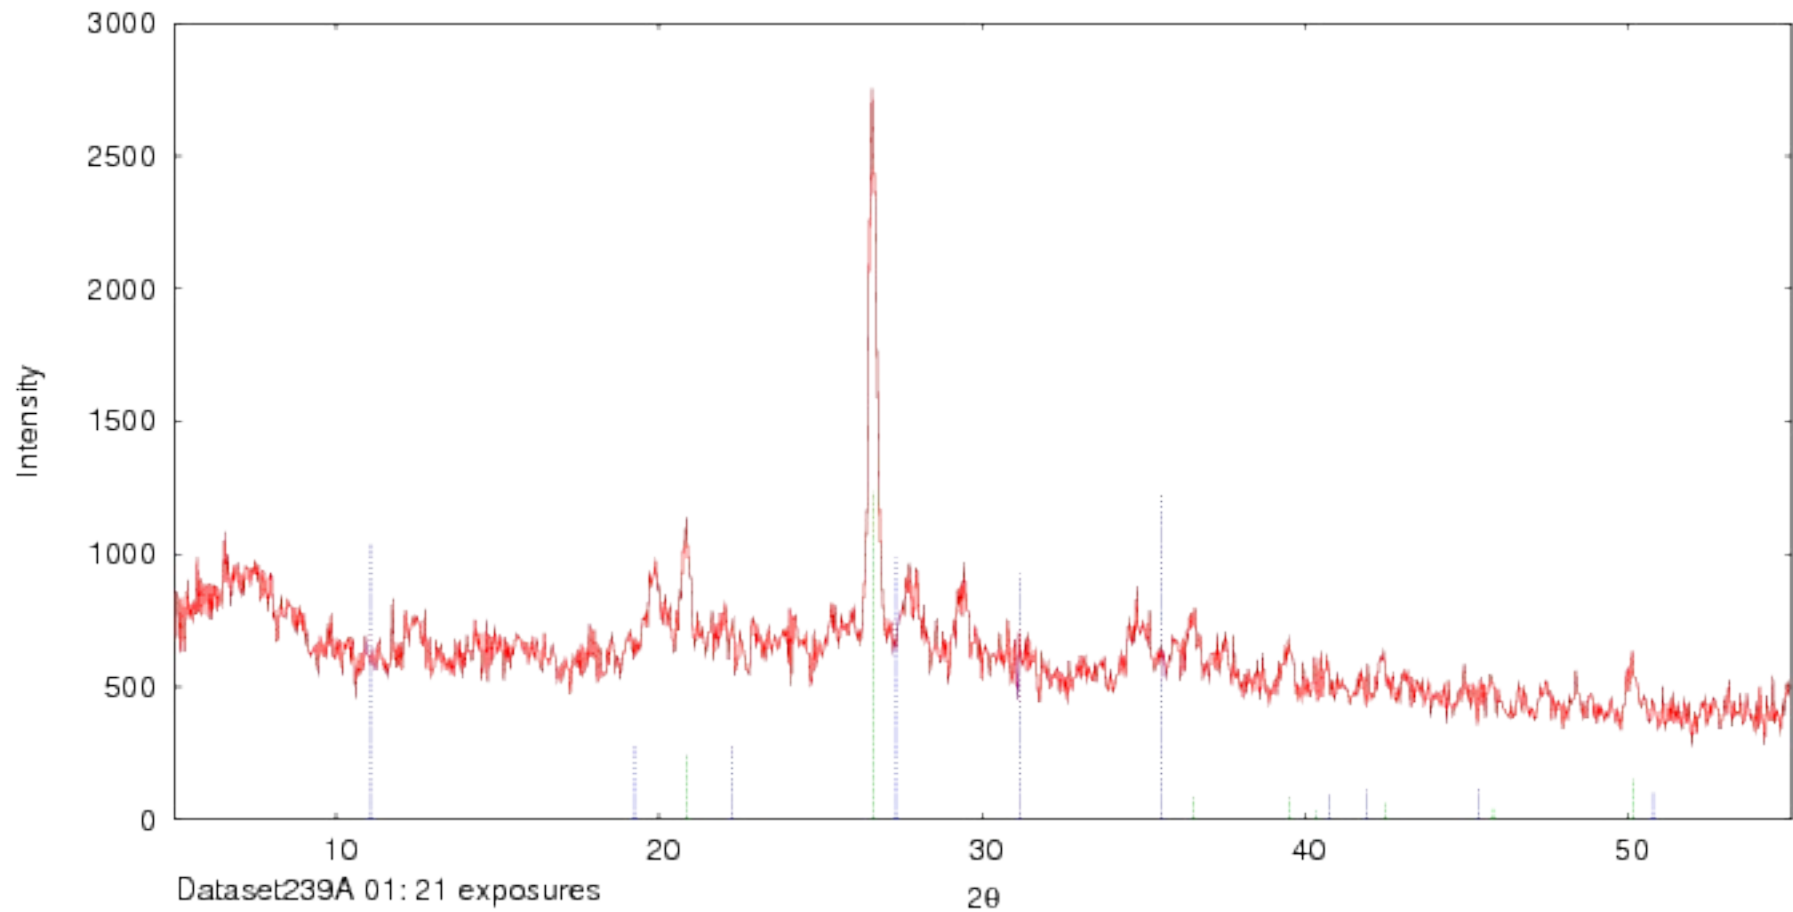

Supplement: Supplementary file 1 [file cp-2022-86-supplement.zip]
